# Supplementary material for: A Universal Validation Method for Mitigating Machine Learning Extrapolation Risk
Source: Research Square preprint supplement (doi:10.21203/rs.3.rs-3758965/v1), 2023-12-22
Supplement: Supplementary file 1 [file f1631363d1aee3fa69e686a6.xlsx]

## Sheet: Linear univariate
x	y	Dataset
-1.72629	400	Training set
-1.71474	402	Training set
-1.70319	404	Training set
-1.69165	406	Training set
-1.6801	408	Training set
-1.66855	410	Training set
-1.657	412	Training set
-1.64546	414	Training set
-1.63391	416	Training set
-1.62236	418	Training set
-1.61082	420	Training set
-1.59927	422	Training set
-1.58772	424	Training set
-1.57617	426	Training set
-1.56463	428	Training set
-1.55308	430	Training set
-1.54153	432	Training set
-1.52999	434	Training set
-1.51844	436	Training set
-1.50689	438	Training set
-1.49535	440	Training set
-1.4838	442	Training set
-1.47225	444	Training set
-1.4607	446	Training set
-1.44916	448	Training set
-1.43761	450	Training set
-1.42606	452	Training set
-1.41452	454	Training set
-1.40297	456	Training set
-1.39142	458	Training set
-1.37987	460	Training set
-1.36833	462	Training set
-1.35678	464	Training set
-1.34523	466	Training set
-1.33369	468	Training set
-1.32214	470	Training set
-1.31059	472	Training set
-1.29905	474	Training set
-1.2875	476	Training set
-1.27595	478	Training set
-1.2644	480	Training set
-1.25286	482	Training set
-1.24131	484	Training set
-1.22976	486	Training set
-1.21822	488	Training set
-1.20667	490	Training set
-1.19512	492	Training set
-1.18357	494	Training set
-1.17203	496	Training set
-1.16048	498	Training set
-1.14893	500	Training set
-1.13739	502	Training set
-1.12584	504	Training set
-1.11429	506	Training set
-1.10275	508	Training set
-1.0912	510	Training set
-1.07965	512	Training set
-1.0681	514	Training set
-1.05656	516	Training set
-1.04501	518	Training set
-1.03346	520	Training set
-1.02192	522	Training set
-1.01037	524	Training set
-0.998822	526	Training set
-0.987274	528	Training set
-0.975727	530	Training set
-0.96418	532	Training set
-0.952633	534	Training set
-0.941086	536	Training set
-0.929539	538	Training set
-0.917992	540	Training set
-0.906445	542	Training set
-0.894898	544	Training set
-0.883351	546	Training set
-0.871804	548	Training set
-0.860257	550	Training set
-0.84871	552	Training set
-0.837163	554	Training set
-0.825615	556	Training set
-0.814068	558	Training set
-0.802521	560	Training set
-0.790974	562	Training set
-0.779427	564	Training set
-0.76788	566	Training set
-0.756333	568	Training set
-0.744786	570	Training set
-0.733239	572	Training set
-0.721692	574	Training set
-0.710145	576	Training set
-0.698598	578	Training set
-0.687051	580	Training set
-0.675504	582	Training set
-0.663956	584	Training set
-0.652409	586	Training set
-0.640862	588	Training set
-0.629315	590	Training set
-0.617768	592	Training set
-0.606221	594	Training set
-0.594674	596	Training set
-0.583127	598	Training set
-0.57158	600	Training set
-0.560033	602	Training set
-0.548486	604	Training set
-0.536939	606	Training set
-0.525392	608	Training set
-0.513845	610	Training set
-0.502298	612	Training set
-0.49075	614	Training set
-0.479203	616	Training set
-0.467656	618	Training set
-0.456109	620	Training set
-0.444562	622	Training set
-0.433015	624	Training set
-0.421468	626	Training set
-0.409921	628	Training set
-0.398374	630	Training set
-0.386827	632	Training set
-0.37528	634	Training set
-0.363733	636	Training set
-0.352186	638	Training set
-0.340639	640	Training set
-0.329091	642	Training set
-0.317544	644	Training set
-0.305997	646	Training set
-0.29445	648	Training set
-0.282903	650	Training set
-0.271356	652	Training set
-0.259809	654	Training set
-0.248262	656	Training set
-0.236715	658	Training set
-0.225168	660	Training set
-0.213621	662	Training set
-0.202074	664	Training set
-0.190527	666	Training set
-0.17898	668	Training set
-0.167433	670	Training set
-0.155885	672	Training set
-0.144338	674	Training set
-0.132791	676	Training set
-0.121244	678	Training set
-0.109697	680	Training set
-0.0981501	682	Training set
-0.086603	684	Training set
-0.075056	686	Training set
-0.0635089	688	Training set
-0.0519618	690	Training set
-0.0404147	692	Training set
-0.0288677	694	Training set
-0.0173206	696	Training set
-0.00577353	698	Training set
0.00577353	700	Training set
0.0173206	702	Training set
0.0288677	704	Training set
0.0404147	706	Training set
0.0519618	708	Training set
0.0635089	710	Training set
0.075056	712	Training set
0.086603	714	Training set
0.0981501	716	Training set
0.109697	718	Training set
0.121244	720	Training set
0.132791	722	Training set
0.144338	724	Training set
0.155885	726	Training set
0.167433	728	Training set
0.17898	730	Training set
0.190527	732	Training set
0.202074	734	Training set
0.213621	736	Training set
0.225168	738	Training set
0.236715	740	Training set
0.248262	742	Training set
0.259809	744	Training set
0.271356	746	Training set
0.282903	748	Training set
0.29445	750	Training set
0.305997	752	Training set
0.317544	754	Training set
0.329091	756	Training set
0.340639	758	Training set
0.352186	760	Training set
0.363733	762	Training set
0.37528	764	Training set
0.386827	766	Training set
0.398374	768	Training set
0.409921	770	Training set
0.421468	772	Training set
0.433015	774	Training set
0.444562	776	Training set
0.456109	778	Training set
0.467656	780	Training set
0.479203	782	Training set
0.49075	784	Training set
0.502298	786	Training set
0.513845	788	Training set
0.525392	790	Training set
0.536939	792	Training set
0.548486	794	Training set
0.560033	796	Training set
0.57158	798	Training set
0.583127	800	Training set
0.594674	802	Training set
0.606221	804	Training set
0.617768	806	Training set
0.629315	808	Training set
0.640862	810	Training set
0.652409	812	Training set
0.663956	814	Training set
0.675504	816	Training set
0.687051	818	Training set
0.698598	820	Training set
0.710145	822	Training set
0.721692	824	Training set
0.733239	826	Training set
0.744786	828	Training set
0.756333	830	Training set
0.76788	832	Training set
0.779427	834	Training set
0.790974	836	Training set
0.802521	838	Training set
0.814068	840	Training set
0.825615	842	Training set
0.837163	844	Training set
0.84871	846	Training set
0.860257	848	Training set
0.871804	850	Training set
0.883351	852	Training set
0.894898	854	Training set
0.906445	856	Training set
0.917992	858	Training set
0.929539	860	Training set
0.941086	862	Training set
0.952633	864	Training set
0.96418	866	Training set
0.975727	868	Training set
0.987274	870	Training set
0.998822	872	Training set
1.01037	874	Training set
1.02192	876	Training set
1.03346	878	Training set
1.04501	880	Training set
1.05656	882	Training set
1.0681	884	Training set
1.07965	886	Training set
1.0912	888	Training set
1.10275	890	Training set
1.11429	892	Training set
1.12584	894	Training set
1.13739	896	Training set
1.14893	898	Training set
1.16048	900	Training set
1.17203	902	Training set
1.18357	904	Training set
1.19512	906	Training set
1.20667	908	Training set
1.21822	910	Training set
1.22976	912	Training set
1.24131	914	Training set
1.25286	916	Training set
1.2644	918	Training set
1.27595	920	Training set
1.2875	922	Training set
1.29905	924	Training set
1.31059	926	Training set
1.32214	928	Training set
1.33369	930	Training set
1.34523	932	Training set
1.35678	934	Training set
1.36833	936	Training set
1.37987	938	Training set
1.39142	940	Training set
1.40297	942	Training set
1.41452	944	Training set
1.42606	946	Training set
1.43761	948	Training set
1.44916	950	Training set
1.4607	952	Training set
1.47225	954	Training set
1.4838	956	Training set
1.49535	958	Training set
1.50689	960	Training set
1.51844	962	Training set
1.52999	964	Training set
1.54153	966	Training set
1.55308	968	Training set
1.56463	970	Training set
1.57617	972	Training set
1.58772	974	Training set
1.59927	976	Training set
1.61082	978	Training set
1.62236	980	Training set
1.63391	982	Training set
1.64546	984	Training set
1.657	986	Training set
1.66855	988	Training set
1.6801	990	Training set
1.69165	992	Training set
1.70319	994	Training set
1.71474	996	Training set
1.72629	998	Training set
1.73783	1000	Test(F) set
1.74938	1002	Test(F) set
1.76093	1004	Test(F) set
1.77248	1006	Test(F) set
1.78402	1008	Test(F) set
1.79557	1010	Test(F) set
1.80712	1012	Test(F) set
1.81866	1014	Test(F) set
1.83021	1016	Test(F) set
1.84176	1018	Test(F) set
1.8533	1020	Test(F) set
1.86485	1022	Test(F) set
1.8764	1024	Test(F) set
1.88795	1026	Test(F) set
1.89949	1028	Test(F) set
1.91104	1030	Test(F) set
1.92259	1032	Test(F) set
1.93413	1034	Test(F) set
1.94568	1036	Test(F) set
1.95723	1038	Test(F) set
1.96878	1040	Test(F) set
1.98032	1042	Test(F) set
1.99187	1044	Test(F) set
2.00342	1046	Test(F) set
2.01496	1048	Test(F) set
2.02651	1050	Test(F) set
2.03806	1052	Test(F) set
2.0496	1054	Test(F) set
2.06115	1056	Test(F) set
2.0727	1058	Test(F) set
2.08425	1060	Test(F) set
2.09579	1062	Test(F) set
2.10734	1064	Test(F) set
2.11889	1066	Test(F) set
2.13043	1068	Test(F) set
2.14198	1070	Test(F) set
2.15353	1072	Test(F) set
2.16508	1074	Test(F) set
2.17662	1076	Test(F) set
2.18817	1078	Test(F) set
2.19972	1080	Test(F) set
2.21126	1082	Test(F) set
2.22281	1084	Test(F) set
2.23436	1086	Test(F) set
2.24591	1088	Test(F) set
2.25745	1090	Test(F) set
2.269	1092	Test(F) set
2.28055	1094	Test(F) set
2.29209	1096	Test(F) set
2.30364	1098	Test(F) set
2.31519	1100	Test(F) set
2.32673	1102	Test(F) set
2.33828	1104	Test(F) set
2.34983	1106	Test(F) set
2.36138	1108	Test(F) set
2.37292	1110	Test(F) set
2.38447	1112	Test(F) set
2.39602	1114	Test(F) set
2.40756	1116	Test(F) set
2.41911	1118	Test(F) set
2.43066	1120	Test(F) set
2.44221	1122	Test(F) set
2.45375	1124	Test(F) set
2.4653	1126	Test(F) set
2.47685	1128	Test(F) set
2.48839	1130	Test(F) set
2.49994	1132	Test(F) set
2.51149	1134	Test(F) set
2.52303	1136	Test(F) set
2.53458	1138	Test(F) set
2.54613	1140	Test(F) set
2.55768	1142	Test(F) set
2.56922	1144	Test(F) set
2.58077	1146	Test(F) set
2.59232	1148	Test(F) set
2.60386	1150	Test(F) set
2.61541	1152	Test(F) set
2.62696	1154	Test(F) set
2.63851	1156	Test(F) set
2.65005	1158	Test(F) set
2.6616	1160	Test(F) set
2.67315	1162	Test(F) set
2.68469	1164	Test(F) set
2.69624	1166	Test(F) set
2.70779	1168	Test(F) set
2.71933	1170	Test(F) set
2.73088	1172	Test(F) set
2.74243	1174	Test(F) set
2.75398	1176	Test(F) set
2.76552	1178	Test(F) set
2.77707	1180	Test(F) set
2.78862	1182	Test(F) set
2.80016	1184	Test(F) set
2.81171	1186	Test(F) set
2.82326	1188	Test(F) set
2.83481	1190	Test(F) set
2.84635	1192	Test(F) set
2.8579	1194	Test(F) set
2.86945	1196	Test(F) set
2.88099	1198	Test(F) set
2.89254	1200	Test(F) set
2.90409	1202	Test(F) set
2.91564	1204	Test(F) set
2.92718	1206	Test(F) set
2.93873	1208	Test(F) set
2.95028	1210	Test(F) set
2.96182	1212	Test(F) set
2.97337	1214	Test(F) set
2.98492	1216	Test(F) set
2.99646	1218	Test(F) set
3.00801	1220	Test(F) set
3.01956	1222	Test(F) set
3.03111	1224	Test(F) set
3.04265	1226	Test(F) set
3.0542	1228	Test(F) set
3.06575	1230	Test(F) set
3.07729	1232	Test(F) set
3.08884	1234	Test(F) set
3.10039	1236	Test(F) set
3.11194	1238	Test(F) set
3.12348	1240	Test(F) set
3.13503	1242	Test(F) set
3.14658	1244	Test(F) set
3.15812	1246	Test(F) set
3.16967	1248	Test(F) set
3.18122	1250	Test(F) set
3.19276	1252	Test(F) set
3.20431	1254	Test(F) set
3.21586	1256	Test(F) set
3.22741	1258	Test(F) set
3.23895	1260	Test(F) set
3.2505	1262	Test(F) set
3.26205	1264	Test(F) set
3.27359	1266	Test(F) set
3.28514	1268	Test(F) set
3.29669	1270	Test(F) set
3.30824	1272	Test(F) set
3.31978	1274	Test(F) set
3.33133	1276	Test(F) set
3.34288	1278	Test(F) set
3.35442	1280	Test(F) set
3.36597	1282	Test(F) set
3.37752	1284	Test(F) set
3.38906	1286	Test(F) set
3.40061	1288	Test(F) set
3.41216	1290	Test(F) set
3.42371	1292	Test(F) set
3.43525	1294	Test(F) set
3.4468	1296	Test(F) set
3.45835	1298	Test(F) set
3.46989	1300	Test(F) set
3.48144	1302	Test(F) set
3.49299	1304	Test(F) set
3.50454	1306	Test(F) set
3.51608	1308	Test(F) set
3.52763	1310	Test(F) set
3.53918	1312	Test(F) set
3.55072	1314	Test(F) set
3.56227	1316	Test(F) set
3.57382	1318	Test(F) set
3.58537	1320	Test(F) set
3.59691	1322	Test(F) set
3.60846	1324	Test(F) set
3.62001	1326	Test(F) set
3.63155	1328	Test(F) set
3.6431	1330	Test(F) set
3.65465	1332	Test(F) set
3.66619	1334	Test(F) set
3.67774	1336	Test(F) set
3.68929	1338	Test(F) set
3.70084	1340	Test(F) set
3.71238	1342	Test(F) set
3.72393	1344	Test(F) set
3.73548	1346	Test(F) set
3.74702	1348	Test(F) set
3.75857	1350	Test(F) set
3.77012	1352	Test(F) set
3.78167	1354	Test(F) set
3.79321	1356	Test(F) set
3.80476	1358	Test(F) set
3.81631	1360	Test(F) set
3.82785	1362	Test(F) set
3.8394	1364	Test(F) set
3.85095	1366	Test(F) set
3.86249	1368	Test(F) set
3.87404	1370	Test(F) set
3.88559	1372	Test(F) set
3.89714	1374	Test(F) set
3.90868	1376	Test(F) set
3.92023	1378	Test(F) set
3.93178	1380	Test(F) set
3.94332	1382	Test(F) set
3.95487	1384	Test(F) set
3.96642	1386	Test(F) set
3.97797	1388	Test(F) set
3.98951	1390	Test(F) set
4.00106	1392	Test(F) set
4.01261	1394	Test(F) set
4.02415	1396	Test(F) set
4.0357	1398	Test(F) set
-1.21822	488	Test(I) set
-1.20667	490	Test(I) set
-1.19512	492	Test(I) set
-1.18357	494	Test(I) set
-1.17203	496	Test(I) set
-1.16048	498	Test(I) set
-1.14893	500	Test(I) set
-1.13739	502	Test(I) set
-1.12584	504	Test(I) set
-1.11429	506	Test(I) set
-1.10275	508	Test(I) set
-1.0912	510	Test(I) set
-1.07965	512	Test(I) set
-1.0681	514	Test(I) set
-1.05656	516	Test(I) set
-1.04501	518	Test(I) set
-1.03346	520	Test(I) set
-1.02192	522	Test(I) set
-1.01037	524	Test(I) set
-0.998822	526	Test(I) set
-0.987274	528	Test(I) set
-0.975727	530	Test(I) set
-0.96418	532	Test(I) set
-0.952633	534	Test(I) set
-0.941086	536	Test(I) set
-0.929539	538	Test(I) set
-0.917992	540	Test(I) set
-0.906445	542	Test(I) set
-0.894898	544	Test(I) set
-0.883351	546	Test(I) set
-0.871804	548	Test(I) set
-0.860257	550	Test(I) set
-0.84871	552	Test(I) set
-0.837163	554	Test(I) set
-0.825615	556	Test(I) set
-0.814068	558	Test(I) set
-0.802521	560	Test(I) set
-0.790974	562	Test(I) set
-0.779427	564	Test(I) set
-0.76788	566	Test(I) set
-0.756333	568	Test(I) set
-0.744786	570	Test(I) set
-0.733239	572	Test(I) set
-0.721692	574	Test(I) set
-0.710145	576	Test(I) set
-0.698598	578	Test(I) set
-0.687051	580	Test(I) set
-0.675504	582	Test(I) set
-0.663956	584	Test(I) set
-0.652409	586	Test(I) set
-0.640862	588	Test(I) set
-0.629315	590	Test(I) set
-0.617768	592	Test(I) set
-0.606221	594	Test(I) set
-0.594674	596	Test(I) set
-0.583127	598	Test(I) set
-0.57158	600	Test(I) set
-0.560033	602	Test(I) set
-0.548486	604	Test(I) set
-0.536939	606	Test(I) set
-0.525392	608	Test(I) set
-0.513845	610	Test(I) set
-0.502298	612	Test(I) set
-0.49075	614	Test(I) set
-0.479203	616	Test(I) set
-0.467656	618	Test(I) set
-0.456109	620	Test(I) set
-0.444562	622	Test(I) set
-0.433015	624	Test(I) set
-0.421468	626	Test(I) set
-0.409921	628	Test(I) set
-0.398374	630	Test(I) set
-0.386827	632	Test(I) set
-0.37528	634	Test(I) set
-0.363733	636	Test(I) set
-0.352186	638	Test(I) set
-0.340639	640	Test(I) set
-0.329091	642	Test(I) set
-0.317544	644	Test(I) set
-0.305997	646	Test(I) set
-0.29445	648	Test(I) set
-0.282903	650	Test(I) set
-0.271356	652	Test(I) set
-0.259809	654	Test(I) set
-0.248262	656	Test(I) set
-0.236715	658	Test(I) set
-0.225168	660	Test(I) set
-0.213621	662	Test(I) set
-0.202074	664	Test(I) set
-0.190527	666	Test(I) set
-0.17898	668	Test(I) set
-0.167433	670	Test(I) set
-0.155885	672	Test(I) set
-0.144338	674	Test(I) set
-0.132791	676	Test(I) set
-0.121244	678	Test(I) set
-0.109697	680	Test(I) set
-0.0981501	682	Test(I) set
-0.086603	684	Test(I) set
-0.075056	686	Test(I) set
-0.0635089	688	Test(I) set
-0.0519618	690	Test(I) set
-0.0404147	692	Test(I) set
-0.0288677	694	Test(I) set
-0.0173206	696	Test(I) set
-0.00577353	698	Test(I) set
0.00577353	700	Test(I) set
0.0173206	702	Test(I) set
0.0288677	704	Test(I) set
0.0404147	706	Test(I) set
0.0519618	708	Test(I) set
0.0635089	710	Test(I) set
0.075056	712	Test(I) set
0.086603	714	Test(I) set
0.0981501	716	Test(I) set
0.109697	718	Test(I) set
0.121244	720	Test(I) set
0.132791	722	Test(I) set
0.144338	724	Test(I) set
0.155885	726	Test(I) set
0.167433	728	Test(I) set
0.17898	730	Test(I) set
0.190527	732	Test(I) set
0.202074	734	Test(I) set
0.213621	736	Test(I) set
0.225168	738	Test(I) set
0.236715	740	Test(I) set
0.248262	742	Test(I) set
0.259809	744	Test(I) set
0.271356	746	Test(I) set
0.282903	748	Test(I) set
0.29445	750	Test(I) set
0.305997	752	Test(I) set
0.317544	754	Test(I) set
0.329091	756	Test(I) set
0.340639	758	Test(I) set
0.352186	760	Test(I) set
0.363733	762	Test(I) set
0.37528	764	Test(I) set
0.386827	766	Test(I) set
0.398374	768	Test(I) set
0.409921	770	Test(I) set
0.421468	772	Test(I) set
0.433015	774	Test(I) set
0.444562	776	Test(I) set
0.456109	778	Test(I) set
0.467656	780	Test(I) set
0.479203	782	Test(I) set
0.49075	784	Test(I) set
0.502298	786	Test(I) set
0.513845	788	Test(I) set
0.525392	790	Test(I) set
0.536939	792	Test(I) set
0.548486	794	Test(I) set
0.560033	796	Test(I) set
0.57158	798	Test(I) set
0.583127	800	Test(I) set
0.594674	802	Test(I) set
0.606221	804	Test(I) set
0.617768	806	Test(I) set
0.629315	808	Test(I) set
0.640862	810	Test(I) set
0.652409	812	Test(I) set
0.663956	814	Test(I) set
0.675504	816	Test(I) set
0.687051	818	Test(I) set
0.698598	820	Test(I) set
0.710145	822	Test(I) set
0.721692	824	Test(I) set
0.733239	826	Test(I) set
0.744786	828	Test(I) set
0.756333	830	Test(I) set
0.76788	832	Test(I) set
0.779427	834	Test(I) set
0.790974	836	Test(I) set
0.802521	838	Test(I) set
0.814068	840	Test(I) set
0.825615	842	Test(I) set
0.837163	844	Test(I) set
0.84871	846	Test(I) set
0.860257	848	Test(I) set
0.871804	850	Test(I) set
0.883351	852	Test(I) set
0.894898	854	Test(I) set
0.906445	856	Test(I) set
0.917992	858	Test(I) set
0.929539	860	Test(I) set
0.941086	862	Test(I) set
0.952633	864	Test(I) set
0.96418	866	Test(I) set
0.975727	868	Test(I) set
0.987274	870	Test(I) set
0.998822	872	Test(I) set
1.01037	874	Test(I) set
1.02192	876	Test(I) set
1.03346	878	Test(I) set
1.04501	880	Test(I) set
1.05656	882	Test(I) set
1.0681	884	Test(I) set
1.07965	886	Test(I) set
-3.92023	20	Test(B) set
-3.90868	22	Test(B) set
-3.89714	24	Test(B) set
-3.88559	26	Test(B) set
-3.87404	28	Test(B) set
-3.86249	30	Test(B) set
-3.85095	32	Test(B) set
-3.8394	34	Test(B) set
-3.82785	36	Test(B) set
-3.81631	38	Test(B) set
-3.80476	40	Test(B) set
-3.79321	42	Test(B) set
-3.78167	44	Test(B) set
-3.77012	46	Test(B) set
-3.75857	48	Test(B) set
-3.74702	50	Test(B) set
-3.73548	52	Test(B) set
-3.72393	54	Test(B) set
-3.71238	56	Test(B) set
-3.70084	58	Test(B) set
-3.68929	60	Test(B) set
-3.67774	62	Test(B) set
-3.66619	64	Test(B) set
-3.65465	66	Test(B) set
-3.6431	68	Test(B) set
-3.63155	70	Test(B) set
-3.62001	72	Test(B) set
-3.60846	74	Test(B) set
-3.59691	76	Test(B) set
-3.58537	78	Test(B) set
-3.57382	80	Test(B) set
-3.56227	82	Test(B) set
-3.55072	84	Test(B) set
-3.53918	86	Test(B) set
-3.52763	88	Test(B) set
-3.51608	90	Test(B) set
-3.50454	92	Test(B) set
-3.49299	94	Test(B) set
-3.48144	96	Test(B) set
-3.46989	98	Test(B) set
-3.45835	100	Test(B) set
-3.4468	102	Test(B) set
-3.43525	104	Test(B) set
-3.42371	106	Test(B) set
-3.41216	108	Test(B) set
-3.40061	110	Test(B) set
-3.38906	112	Test(B) set
-3.37752	114	Test(B) set
-3.36597	116	Test(B) set
-3.35442	118	Test(B) set
-3.34288	120	Test(B) set
-3.33133	122	Test(B) set
-3.31978	124	Test(B) set
-3.30824	126	Test(B) set
-3.29669	128	Test(B) set
-3.28514	130	Test(B) set
-3.27359	132	Test(B) set
-3.26205	134	Test(B) set
-3.2505	136	Test(B) set
-3.23895	138	Test(B) set
-3.22741	140	Test(B) set
-3.21586	142	Test(B) set
-3.20431	144	Test(B) set
-3.19276	146	Test(B) set
-3.18122	148	Test(B) set
-3.16967	150	Test(B) set
-3.15812	152	Test(B) set
-3.14658	154	Test(B) set
-3.13503	156	Test(B) set
-3.12348	158	Test(B) set
-3.11194	160	Test(B) set
-3.10039	162	Test(B) set
-3.08884	164	Test(B) set
-3.07729	166	Test(B) set
-3.06575	168	Test(B) set
-3.0542	170	Test(B) set
-3.04265	172	Test(B) set
-3.03111	174	Test(B) set
-3.01956	176	Test(B) set
-3.00801	178	Test(B) set
-2.99646	180	Test(B) set
-2.98492	182	Test(B) set
-2.97337	184	Test(B) set
-2.96182	186	Test(B) set
-2.95028	188	Test(B) set
-2.93873	190	Test(B) set
-2.92718	192	Test(B) set
-2.91564	194	Test(B) set
-2.90409	196	Test(B) set
-2.89254	198	Test(B) set
-2.88099	200	Test(B) set
-2.86945	202	Test(B) set
-2.8579	204	Test(B) set
-2.84635	206	Test(B) set
-2.83481	208	Test(B) set
-2.82326	210	Test(B) set
-2.81171	212	Test(B) set
-2.80016	214	Test(B) set
-2.78862	216	Test(B) set
-2.77707	218	Test(B) set
-2.76552	220	Test(B) set
-2.75398	222	Test(B) set
-2.74243	224	Test(B) set
-2.73088	226	Test(B) set
-2.71933	228	Test(B) set
-2.70779	230	Test(B) set
-2.69624	232	Test(B) set
-2.68469	234	Test(B) set
-2.67315	236	Test(B) set
-2.6616	238	Test(B) set
-2.65005	240	Test(B) set
-2.63851	242	Test(B) set
-2.62696	244	Test(B) set
-2.61541	246	Test(B) set
-2.60386	248	Test(B) set
-2.59232	250	Test(B) set
-2.58077	252	Test(B) set
-2.56922	254	Test(B) set
-2.55768	256	Test(B) set
-2.54613	258	Test(B) set
-2.53458	260	Test(B) set
-2.52303	262	Test(B) set
-2.51149	264	Test(B) set
-2.49994	266	Test(B) set
-2.48839	268	Test(B) set
-2.47685	270	Test(B) set
-2.4653	272	Test(B) set
-2.45375	274	Test(B) set
-2.44221	276	Test(B) set
-2.43066	278	Test(B) set
-2.41911	280	Test(B) set
-2.40756	282	Test(B) set
-2.39602	284	Test(B) set
-2.38447	286	Test(B) set
-2.37292	288	Test(B) set
-2.36138	290	Test(B) set
-2.34983	292	Test(B) set
-2.33828	294	Test(B) set
-2.32673	296	Test(B) set
-2.31519	298	Test(B) set
-2.30364	300	Test(B) set
-2.29209	302	Test(B) set
-2.28055	304	Test(B) set
-2.269	306	Test(B) set
-2.25745	308	Test(B) set
-2.24591	310	Test(B) set
-2.23436	312	Test(B) set
-2.22281	314	Test(B) set
-2.21126	316	Test(B) set
-2.19972	318	Test(B) set
-2.18817	320	Test(B) set
-2.17662	322	Test(B) set
-2.16508	324	Test(B) set
-2.15353	326	Test(B) set
-2.14198	328	Test(B) set
-2.13043	330	Test(B) set
-2.11889	332	Test(B) set
-2.10734	334	Test(B) set
-2.09579	336	Test(B) set
-2.08425	338	Test(B) set
-2.0727	340	Test(B) set
-2.06115	342	Test(B) set
-2.0496	344	Test(B) set
-2.03806	346	Test(B) set
-2.02651	348	Test(B) set
-2.01496	350	Test(B) set
-2.00342	352	Test(B) set
-1.99187	354	Test(B) set
-1.98032	356	Test(B) set
-1.96878	358	Test(B) set
-1.95723	360	Test(B) set
-1.94568	362	Test(B) set
-1.93413	364	Test(B) set
-1.92259	366	Test(B) set
-1.91104	368	Test(B) set
-1.89949	370	Test(B) set
-1.88795	372	Test(B) set
-1.8764	374	Test(B) set
-1.86485	376	Test(B) set
-1.8533	378	Test(B) set
-1.84176	380	Test(B) set
-1.83021	382	Test(B) set
-1.81866	384	Test(B) set
-1.80712	386	Test(B) set
-1.79557	388	Test(B) set
-1.78402	390	Test(B) set
-1.77248	392	Test(B) set
-1.76093	394	Test(B) set
-1.74938	396	Test(B) set
-1.73783	398	Test(B) set

## Sheet: Linear multivariate
x1	x2	x3	x4	x5	y	Dataset
-1.72629	-1.87073	-2.02562	-1.72629	2.36091	259.327	Training set
-1.71474	-1.85573	-2.0064	-1.71474	2.33065	260.549	Training set
-1.70319	-1.84077	-1.98727	-1.70319	2.30069	261.77	Training set
-1.69165	-1.82584	-1.96824	-1.69165	2.27102	262.992	Training set
-1.6801	-1.81096	-1.9493	-1.6801	2.24165	264.213	Training set
-1.66855	-1.7961	-1.93046	-1.66855	2.21256	265.434	Training set
-1.657	-1.78129	-1.91171	-1.657	2.18375	266.655	Training set
-1.64546	-1.76651	-1.89304	-1.64546	2.15522	267.875	Training set
-1.63391	-1.75176	-1.87447	-1.63391	2.12697	269.096	Training set
-1.62236	-1.73705	-1.85599	-1.62236	2.09898	270.316	Training set
-1.61082	-1.72238	-1.83759	-1.61082	2.07126	271.537	Training set
-1.59927	-1.70774	-1.81928	-1.59927	2.04381	272.757	Training set
-1.58772	-1.69314	-1.80106	-1.58772	2.01661	273.977	Training set
-1.57617	-1.67857	-1.78293	-1.57617	1.98967	275.197	Training set
-1.56463	-1.66403	-1.76488	-1.56463	1.96298	276.416	Training set
-1.55308	-1.64953	-1.74691	-1.55308	1.93654	277.636	Training set
-1.54153	-1.63506	-1.72903	-1.54153	1.91035	278.855	Training set
-1.52999	-1.62063	-1.71123	-1.52999	1.88439	280.075	Training set
-1.51844	-1.60622	-1.69351	-1.51844	1.85868	281.294	Training set
-1.50689	-1.59186	-1.67587	-1.50689	1.83319	282.513	Training set
-1.49535	-1.57752	-1.65832	-1.49535	1.80795	283.732	Training set
-1.4838	-1.56322	-1.64084	-1.4838	1.78292	284.951	Training set
-1.47225	-1.54895	-1.62344	-1.47225	1.75813	286.169	Training set
-1.4607	-1.53471	-1.60612	-1.4607	1.73355	287.388	Training set
-1.44916	-1.5205	-1.58888	-1.44916	1.7092	288.606	Training set
-1.43761	-1.50632	-1.57171	-1.43761	1.68506	289.825	Training set
-1.42606	-1.49218	-1.55462	-1.42606	1.66114	291.043	Training set
-1.41452	-1.47807	-1.53761	-1.41452	1.63743	292.261	Training set
-1.40297	-1.46399	-1.52067	-1.40297	1.61392	293.479	Training set
-1.39142	-1.44994	-1.5038	-1.39142	1.59062	294.697	Training set
-1.37987	-1.43592	-1.48701	-1.37987	1.56752	295.914	Training set
-1.36833	-1.42193	-1.47029	-1.36833	1.54463	297.132	Training set
-1.35678	-1.40797	-1.45364	-1.35678	1.52193	298.349	Training set
-1.34523	-1.39404	-1.43707	-1.34523	1.49942	299.567	Training set
-1.33369	-1.38014	-1.42057	-1.33369	1.47711	300.784	Training set
-1.32214	-1.36627	-1.40413	-1.32214	1.45499	302.001	Training set
-1.31059	-1.35243	-1.38777	-1.31059	1.43305	303.218	Training set
-1.29905	-1.33862	-1.37147	-1.29905	1.4113	304.435	Training set
-1.2875	-1.32484	-1.35525	-1.2875	1.38973	305.652	Training set
-1.27595	-1.31108	-1.33909	-1.27595	1.36835	306.868	Training set
-1.2644	-1.29736	-1.323	-1.2644	1.34714	308.085	Training set
-1.25286	-1.28366	-1.30697	-1.25286	1.3261	309.301	Training set
-1.24131	-1.27	-1.29102	-1.24131	1.30525	310.517	Training set
-1.22976	-1.25636	-1.27512	-1.22976	1.28456	311.734	Training set
-1.21822	-1.24275	-1.2593	-1.21822	1.26404	312.95	Training set
-1.20667	-1.22916	-1.24354	-1.20667	1.24369	314.166	Training set
-1.19512	-1.21561	-1.22784	-1.19512	1.22351	315.382	Training set
-1.18357	-1.20208	-1.2122	-1.18357	1.20348	316.597	Training set
-1.17203	-1.18858	-1.19663	-1.17203	1.18363	317.813	Training set
-1.16048	-1.17511	-1.18113	-1.16048	1.16392	319.029	Training set
-1.14893	-1.16166	-1.16568	-1.14893	1.14438	320.244	Training set
-1.13739	-1.14824	-1.15029	-1.13739	1.125	321.459	Training set
-1.12584	-1.13485	-1.13497	-1.12584	1.10576	322.675	Training set
-1.11429	-1.12148	-1.11971	-1.11429	1.08668	323.89	Training set
-1.10275	-1.10814	-1.10451	-1.10275	1.06775	325.105	Training set
-1.0912	-1.09483	-1.08936	-1.0912	1.04897	326.32	Training set
-1.07965	-1.08154	-1.07428	-1.07965	1.03033	327.534	Training set
-1.0681	-1.06828	-1.05926	-1.0681	1.01184	328.749	Training set
-1.05656	-1.05504	-1.04429	-1.05656	0.993494	329.964	Training set
-1.04501	-1.04183	-1.02938	-1.04501	0.975289	331.178	Training set
-1.03346	-1.02865	-1.01453	-1.03346	0.957223	332.393	Training set
-1.02192	-1.01549	-0.999739	-1.02192	0.939296	333.607	Training set
-1.01037	-1.00236	-0.985002	-1.01037	0.921506	334.821	Training set
-0.998822	-0.989247	-0.970321	-0.998822	0.903851	336.035	Training set
-0.987274	-0.976163	-0.955696	-0.987274	0.88633	337.249	Training set
-0.975727	-0.963104	-0.941126	-0.975727	0.868941	338.463	Training set
-0.96418	-0.950069	-0.926611	-0.96418	0.851683	339.677	Training set
-0.952633	-0.937059	-0.91215	-0.952633	0.834554	340.891	Training set
-0.941086	-0.924073	-0.897744	-0.941086	0.817552	342.104	Training set
-0.929539	-0.911111	-0.883391	-0.929539	0.800678	343.318	Training set
-0.917992	-0.898173	-0.869091	-0.917992	0.783928	344.531	Training set
-0.906445	-0.885259	-0.854844	-0.906445	0.767302	345.745	Training set
-0.894898	-0.872369	-0.84065	-0.894898	0.750798	346.958	Training set
-0.883351	-0.859503	-0.826508	-0.883351	0.734415	348.171	Training set
-0.871804	-0.84666	-0.812417	-0.871804	0.718152	349.384	Training set
-0.860257	-0.833841	-0.798378	-0.860257	0.702007	350.597	Training set
-0.84871	-0.821045	-0.78439	-0.84871	0.685979	351.81	Training set
-0.837163	-0.808272	-0.770452	-0.837163	0.670066	353.023	Training set
-0.825615	-0.795522	-0.756565	-0.825615	0.654268	354.236	Training set
-0.814068	-0.782795	-0.742727	-0.814068	0.638584	355.448	Training set
-0.802521	-0.770091	-0.728939	-0.802521	0.623011	356.661	Training set
-0.790974	-0.757409	-0.715201	-0.790974	0.607549	357.873	Training set
-0.779427	-0.74475	-0.701511	-0.779427	0.592197	359.086	Training set
-0.76788	-0.732114	-0.687869	-0.76788	0.576953	360.298	Training set
-0.756333	-0.7195	-0.674276	-0.756333	0.561817	361.51	Training set
-0.744786	-0.706908	-0.66073	-0.744786	0.546787	362.722	Training set
-0.733239	-0.694338	-0.647232	-0.733239	0.531862	363.934	Training set
-0.721692	-0.68179	-0.63378	-0.721692	0.517041	365.146	Training set
-0.710145	-0.669263	-0.620376	-0.710145	0.502323	366.358	Training set
-0.698598	-0.656759	-0.607018	-0.698598	0.487707	367.57	Training set
-0.687051	-0.644276	-0.593707	-0.687051	0.473192	368.781	Training set
-0.675504	-0.631815	-0.580441	-0.675504	0.458776	369.993	Training set
-0.663956	-0.619375	-0.56722	-0.663956	0.444459	371.204	Training set
-0.652409	-0.606956	-0.554045	-0.652409	0.43024	372.416	Training set
-0.640862	-0.594559	-0.540915	-0.640862	0.416118	373.627	Training set
-0.629315	-0.582182	-0.527829	-0.629315	0.402091	374.838	Training set
-0.617768	-0.569827	-0.514788	-0.617768	0.388159	376.05	Training set
-0.606221	-0.557492	-0.50179	-0.606221	0.374321	377.261	Training set
-0.594674	-0.545179	-0.488836	-0.594674	0.360576	378.472	Training set
-0.583127	-0.532885	-0.475926	-0.583127	0.346923	379.683	Training set
-0.57158	-0.520613	-0.463059	-0.57158	0.33336	380.893	Training set
-0.560033	-0.50836	-0.450234	-0.560033	0.319888	382.104	Training set
-0.548486	-0.496129	-0.437452	-0.548486	0.306505	383.315	Training set
-0.536939	-0.483917	-0.424713	-0.536939	0.293211	384.526	Training set
-0.525392	-0.471725	-0.412015	-0.525392	0.280004	385.736	Training set
-0.513845	-0.459554	-0.399359	-0.513845	0.266883	386.947	Training set
-0.502298	-0.447402	-0.386744	-0.502298	0.253848	388.157	Training set
-0.49075	-0.435271	-0.374171	-0.49075	0.240899	389.367	Training set
-0.479203	-0.423159	-0.361638	-0.479203	0.228033	390.578	Training set
-0.467656	-0.411066	-0.349147	-0.467656	0.21525	391.788	Training set
-0.456109	-0.398994	-0.336695	-0.456109	0.20255	392.998	Training set
-0.444562	-0.38694	-0.324284	-0.444562	0.189932	394.208	Training set
-0.433015	-0.374906	-0.311912	-0.433015	0.177395	395.418	Training set
-0.421468	-0.362892	-0.29958	-0.421468	0.164937	396.628	Training set
-0.409921	-0.350896	-0.287287	-0.409921	0.152559	397.837	Training set
-0.398374	-0.33892	-0.275034	-0.398374	0.14026	399.047	Training set
-0.386827	-0.326962	-0.262819	-0.386827	0.128038	400.257	Training set
-0.37528	-0.315024	-0.250643	-0.37528	0.115894	401.466	Training set
-0.363733	-0.303104	-0.238505	-0.363733	0.103826	402.676	Training set
-0.352186	-0.291203	-0.226406	-0.352186	0.0918336	403.885	Training set
-0.340639	-0.279321	-0.214344	-0.340639	0.0799161	405.095	Training set
-0.329091	-0.267457	-0.20232	-0.329091	0.0680729	406.304	Training set
-0.317544	-0.255612	-0.190333	-0.317544	0.0563033	407.513	Training set
-0.305997	-0.243785	-0.178383	-0.305997	0.0446065	408.722	Training set
-0.29445	-0.231976	-0.166471	-0.29445	0.032982	409.931	Training set
-0.282903	-0.220186	-0.154595	-0.282903	0.021429	411.14	Training set
-0.271356	-0.208413	-0.142755	-0.271356	0.00994684	412.349	Training set
-0.259809	-0.196659	-0.130952	-0.259809	-0.00146507	413.558	Training set
-0.248262	-0.184923	-0.119185	-0.248262	-0.0128074	414.767	Training set
-0.236715	-0.173204	-0.107453	-0.236715	-0.0240808	415.976	Training set
-0.225168	-0.161504	-0.0957576	-0.225168	-0.0352858	417.184	Training set
-0.213621	-0.149821	-0.0840973	-0.213621	-0.0464232	418.393	Training set
-0.202074	-0.138155	-0.0724721	-0.202074	-0.0574934	419.601	Training set
-0.190527	-0.126508	-0.0608819	-0.190527	-0.0684972	420.81	Training set
-0.17898	-0.114877	-0.0493264	-0.17898	-0.0794351	422.018	Training set
-0.167433	-0.103265	-0.0378055	-0.167433	-0.0903076	423.226	Training set
-0.155885	-0.0916691	-0.0263189	-0.155885	-0.101116	424.435	Training set
-0.144338	-0.0800908	-0.0148665	-0.144338	-0.111859	425.643	Training set
-0.132791	-0.0685297	-0.00344797	-0.132791	-0.122539	426.851	Training set
-0.121244	-0.0569856	0.00793681	-0.121244	-0.133156	428.059	Training set
-0.109697	-0.0454586	0.019288	-0.109697	-0.143711	429.267	Training set
-0.0981501	-0.0339485	0.030606	-0.0981501	-0.154204	430.475	Training set
-0.086603	-0.0224553	0.0418907	-0.086603	-0.164635	431.683	Training set
-0.075056	-0.0109788	0.0531425	-0.075056	-0.175006	432.891	Training set
-0.0635089	0.000480869	0.0643616	-0.0635089	-0.185316	434.098	Training set
-0.0519618	0.0119239	0.0755481	-0.0519618	-0.195567	435.306	Training set
-0.0404147	0.0233504	0.0867022	-0.0404147	-0.205758	436.514	Training set
-0.0288677	0.0347604	0.0978241	-0.0288677	-0.215891	437.721	Training set
-0.0173206	0.046154	0.108914	-0.0173206	-0.225965	438.929	Training set
-0.00577353	0.0575312	0.119972	-0.00577353	-0.235981	440.136	Training set
0.00577353	0.0688921	0.130999	0.00577353	-0.245941	441.343	Training set
0.0173206	0.0802368	0.141994	0.0173206	-0.255843	442.551	Training set
0.0288677	0.0915654	0.152957	0.0288677	-0.26569	443.758	Training set
0.0404147	0.102878	0.16389	0.0404147	-0.27548	444.965	Training set
0.0519618	0.114174	0.174792	0.0519618	-0.285215	446.172	Training set
0.0635089	0.125455	0.185663	0.0635089	-0.294896	447.379	Training set
0.075056	0.13672	0.196503	0.075056	-0.304522	448.586	Training set
0.086603	0.147968	0.207313	0.086603	-0.314094	449.793	Training set
0.0981501	0.159201	0.218093	0.0981501	-0.323612	451	Training set
0.109697	0.170419	0.228842	0.109697	-0.333078	452.207	Training set
0.121244	0.181621	0.239562	0.121244	-0.342491	453.413	Training set
0.132791	0.192807	0.250252	0.132791	-0.351852	454.62	Training set
0.144338	0.203978	0.260912	0.144338	-0.361161	455.827	Training set
0.155885	0.215133	0.271543	0.155885	-0.370419	457.033	Training set
0.167433	0.226273	0.282145	0.167433	-0.379626	458.24	Training set
0.17898	0.237398	0.292718	0.17898	-0.388782	459.446	Training set
0.190527	0.248507	0.303262	0.190527	-0.397889	460.653	Training set
0.202074	0.259601	0.313777	0.202074	-0.406945	461.859	Training set
0.213621	0.270681	0.324263	0.213621	-0.415953	463.065	Training set
0.225168	0.281745	0.334721	0.225168	-0.424912	464.271	Training set
0.236715	0.292794	0.345151	0.236715	-0.433822	465.478	Training set
0.248262	0.303828	0.355552	0.248262	-0.442685	466.684	Training set
0.259809	0.314848	0.365926	0.259809	-0.451499	467.89	Training set
0.271356	0.325852	0.376271	0.271356	-0.460267	469.096	Training set
0.282903	0.336842	0.386589	0.282903	-0.468987	470.302	Training set
0.29445	0.347817	0.396879	0.29445	-0.477661	471.508	Training set
0.305997	0.358778	0.407142	0.305997	-0.486289	472.713	Training set
0.317544	0.369724	0.417378	0.317544	-0.494871	473.919	Training set
0.329091	0.380655	0.427587	0.329091	-0.503408	475.125	Training set
0.340639	0.391572	0.437768	0.340639	-0.5119	476.33	Training set
0.352186	0.402475	0.447923	0.352186	-0.520347	477.536	Training set
0.363733	0.413363	0.458051	0.363733	-0.528749	478.742	Training set
0.37528	0.424237	0.468153	0.37528	-0.537108	479.947	Training set
0.386827	0.435097	0.478228	0.386827	-0.545423	481.153	Training set
0.398374	0.445943	0.488277	0.398374	-0.553695	482.358	Training set
0.409921	0.456774	0.4983	0.409921	-0.561923	483.563	Training set
0.421468	0.467592	0.508296	0.421468	-0.570109	484.769	Training set
0.433015	0.478395	0.518267	0.433015	-0.578253	485.974	Training set
0.444562	0.489185	0.528212	0.444562	-0.586355	487.179	Training set
0.456109	0.49996	0.538132	0.456109	-0.594415	488.384	Training set
0.467656	0.510722	0.548026	0.467656	-0.602434	489.589	Training set
0.479203	0.52147	0.557895	0.479203	-0.610412	490.794	Training set
0.49075	0.532204	0.567738	0.49075	-0.618349	491.999	Training set
0.502298	0.542925	0.577557	0.502298	-0.626245	493.204	Training set
0.513845	0.553632	0.58735	0.513845	-0.634102	494.409	Training set
0.525392	0.564325	0.597119	0.525392	-0.641919	495.614	Training set
0.536939	0.575005	0.606863	0.536939	-0.649696	496.818	Training set
0.548486	0.585671	0.616582	0.548486	-0.657434	498.023	Training set
0.560033	0.596324	0.626277	0.560033	-0.665134	499.228	Training set
0.57158	0.606964	0.635948	0.57158	-0.672794	500.432	Training set
0.583127	0.61759	0.645594	0.583127	-0.680417	501.637	Training set
0.594674	0.628203	0.655217	0.594674	-0.688001	502.841	Training set
0.606221	0.638803	0.664815	0.606221	-0.695548	504.046	Training set
0.617768	0.649389	0.67439	0.617768	-0.703057	505.25	Training set
0.629315	0.659962	0.68394	0.629315	-0.710529	506.454	Training set
0.640862	0.670523	0.693468	0.640862	-0.717964	507.659	Training set
0.652409	0.68107	0.702971	0.652409	-0.725362	508.863	Training set
0.663956	0.691604	0.712452	0.663956	-0.732725	510.067	Training set
0.675504	0.702126	0.721909	0.675504	-0.740051	511.271	Training set
0.687051	0.712634	0.731343	0.687051	-0.747341	512.475	Training set
0.698598	0.72313	0.740753	0.698598	-0.754596	513.679	Training set
0.710145	0.733613	0.750141	0.710145	-0.761815	514.883	Training set
0.721692	0.744083	0.759506	0.721692	-0.768999	516.087	Training set
0.733239	0.75454	0.768849	0.733239	-0.776149	517.291	Training set
0.744786	0.764985	0.778169	0.744786	-0.783264	518.495	Training set
0.756333	0.775417	0.787466	0.756333	-0.790344	519.699	Training set
0.76788	0.785837	0.796741	0.76788	-0.797391	520.903	Training set
0.779427	0.796244	0.805994	0.779427	-0.804404	522.106	Training set
0.790974	0.806639	0.815224	0.790974	-0.811383	523.31	Training set
0.802521	0.817021	0.824433	0.802521	-0.818329	524.514	Training set
0.814068	0.827391	0.833619	0.814068	-0.825242	525.717	Training set
0.825615	0.837748	0.842784	0.825615	-0.832122	526.921	Training set
0.837163	0.848093	0.851927	0.837163	-0.83897	528.124	Training set
0.84871	0.858426	0.861048	0.84871	-0.845785	529.328	Training set
0.860257	0.868747	0.870148	0.860257	-0.852568	530.531	Training set
0.871804	0.879056	0.879226	0.871804	-0.859319	531.735	Training set
0.883351	0.889352	0.888283	0.883351	-0.866038	532.938	Training set
0.894898	0.899637	0.897319	0.894898	-0.872726	534.141	Training set
0.906445	0.909909	0.906333	0.906445	-0.879382	535.344	Training set
0.917992	0.920169	0.915327	0.917992	-0.886008	536.547	Training set
0.929539	0.930418	0.9243	0.929539	-0.892603	537.751	Training set
0.941086	0.940654	0.933251	0.941086	-0.899167	538.954	Training set
0.952633	0.950879	0.942182	0.952633	-0.9057	540.157	Training set
0.96418	0.961091	0.951093	0.96418	-0.912204	541.36	Training set
0.975727	0.971292	0.959983	0.975727	-0.918678	542.563	Training set
0.987274	0.981482	0.968852	0.987274	-0.925122	543.765	Training set
0.998822	0.991659	0.977701	0.998822	-0.931536	544.968	Training set
1.01037	1.00183	0.98653	1.01037	-0.937921	546.171	Training set
1.02192	1.01198	0.995338	1.02192	-0.944276	547.374	Training set
1.03346	1.02212	1.00413	1.03346	-0.950603	548.577	Training set
1.04501	1.03225	1.0129	1.04501	-0.956901	549.779	Training set
1.05656	1.04237	1.02164	1.05656	-0.963171	550.982	Training set
1.0681	1.05248	1.03037	1.0681	-0.969412	552.184	Training set
1.07965	1.06258	1.03908	1.07965	-0.975625	553.387	Training set
1.0912	1.07266	1.04777	1.0912	-0.98181	554.589	Training set
1.10275	1.08274	1.05644	1.10275	-0.987967	555.792	Training set
1.11429	1.0928	1.06509	1.11429	-0.994097	556.994	Training set
1.12584	1.10285	1.07372	1.12584	-1.0002	558.197	Training set
1.13739	1.11289	1.08233	1.13739	-1.00627	559.399	Training set
1.14893	1.12292	1.09093	1.14893	-1.01232	560.601	Training set
1.16048	1.13294	1.0995	1.16048	-1.01834	561.804	Training set
1.17203	1.14294	1.10805	1.17203	-1.02434	563.006	Training set
1.18357	1.15294	1.11659	1.18357	-1.0303	564.208	Training set
1.19512	1.16292	1.12511	1.19512	-1.03625	565.41	Training set
1.20667	1.1729	1.1336	1.20667	-1.04216	566.612	Training set
1.21822	1.18286	1.14208	1.21822	-1.04805	567.814	Training set
1.22976	1.19281	1.15054	1.22976	-1.05391	569.016	Training set
1.24131	1.20275	1.15899	1.24131	-1.05975	570.218	Training set
1.25286	1.21268	1.16741	1.25286	-1.06556	571.42	Training set
1.2644	1.2226	1.17581	1.2644	-1.07135	572.622	Training set
1.27595	1.23251	1.1842	1.27595	-1.07711	573.824	Training set
1.2875	1.24241	1.19257	1.2875	-1.08285	575.025	Training set
1.29905	1.25229	1.20092	1.29905	-1.08856	576.227	Training set
1.31059	1.26217	1.20925	1.31059	-1.09425	577.429	Training set
1.32214	1.27204	1.21757	1.32214	-1.09991	578.631	Training set
1.33369	1.28189	1.22586	1.33369	-1.10555	579.832	Training set
1.34523	1.29173	1.23414	1.34523	-1.11116	581.034	Training set
1.35678	1.30157	1.2424	1.35678	-1.11675	582.235	Training set
1.36833	1.31139	1.25065	1.36833	-1.12232	583.437	Training set
1.37987	1.3212	1.25887	1.37987	-1.12786	584.638	Training set
1.39142	1.33101	1.26708	1.39142	-1.13338	585.84	Training set
1.40297	1.3408	1.27527	1.40297	-1.13888	587.041	Training set
1.41452	1.35058	1.28344	1.41452	-1.14435	588.242	Training set
1.42606	1.36035	1.2916	1.42606	-1.1498	589.444	Training set
1.43761	1.37011	1.29974	1.43761	-1.15522	590.645	Training set
1.44916	1.37986	1.30786	1.44916	-1.16063	591.846	Training set
1.4607	1.3896	1.31597	1.4607	-1.16601	593.047	Training set
1.47225	1.39933	1.32405	1.47225	-1.17137	594.249	Training set
1.4838	1.40905	1.33212	1.4838	-1.1767	595.45	Training set
1.49535	1.41876	1.34018	1.49535	-1.18201	596.651	Training set
1.50689	1.42846	1.34821	1.50689	-1.18731	597.852	Training set
1.51844	1.43815	1.35624	1.51844	-1.19257	599.053	Training set
1.52999	1.44783	1.36424	1.52999	-1.19782	600.254	Training set
1.54153	1.4575	1.37223	1.54153	-1.20305	601.455	Training set
1.55308	1.46716	1.3802	1.55308	-1.20825	602.656	Training set
1.56463	1.4768	1.38815	1.56463	-1.21343	603.856	Training set
1.57617	1.48644	1.39609	1.57617	-1.21859	605.057	Training set
1.58772	1.49607	1.40401	1.58772	-1.22373	606.258	Training set
1.59927	1.50569	1.41191	1.59927	-1.22885	607.459	Training set
1.61082	1.5153	1.4198	1.61082	-1.23395	608.66	Training set
1.62236	1.5249	1.42768	1.62236	-1.23903	609.86	Training set
1.63391	1.53449	1.43553	1.63391	-1.24409	611.061	Training set
1.64546	1.54407	1.44337	1.64546	-1.24912	612.261	Training set
1.657	1.55364	1.4512	1.657	-1.25414	613.462	Training set
1.66855	1.5632	1.45901	1.66855	-1.25913	614.662	Training set
1.6801	1.57275	1.4668	1.6801	-1.26411	615.863	Training set
1.69165	1.5823	1.47458	1.69165	-1.26906	617.063	Training set
1.70319	1.59183	1.48234	1.70319	-1.274	618.264	Training set
1.71474	1.60135	1.49009	1.71474	-1.27891	619.464	Training set
1.72629	1.61086	1.49782	1.72629	-1.28381	620.665	Training set
1.73783	1.62037	1.50553	1.73783	-1.28868	621.865	Test(F) set
1.74938	1.62986	1.51323	1.74938	-1.29354	623.065	Test(F) set
1.76093	1.63934	1.52092	1.76093	-1.29838	624.265	Test(F) set
1.77248	1.64882	1.52859	1.77248	-1.30319	625.466	Test(F) set
1.78402	1.65828	1.53624	1.78402	-1.30799	626.666	Test(F) set
1.79557	1.66774	1.54388	1.79557	-1.31277	627.866	Test(F) set
1.80712	1.67719	1.5515	1.80712	-1.31753	629.066	Test(F) set
1.81866	1.68662	1.55911	1.81866	-1.32228	630.266	Test(F) set
1.83021	1.69605	1.5667	1.83021	-1.327	631.466	Test(F) set
1.84176	1.70547	1.57428	1.84176	-1.3317	632.666	Test(F) set
1.8533	1.71488	1.58185	1.8533	-1.33639	633.866	Test(F) set
1.86485	1.72428	1.5894	1.86485	-1.34106	635.066	Test(F) set
1.8764	1.73367	1.59693	1.8764	-1.34571	636.266	Test(F) set
1.88795	1.74305	1.60445	1.88795	-1.35034	637.466	Test(F) set
1.89949	1.75243	1.61195	1.89949	-1.35495	638.665	Test(F) set
1.91104	1.76179	1.61944	1.91104	-1.35955	639.865	Test(F) set
1.92259	1.77114	1.62692	1.92259	-1.36413	641.065	Test(F) set
1.93413	1.78049	1.63438	1.93413	-1.36869	642.265	Test(F) set
1.94568	1.78983	1.64183	1.94568	-1.37323	643.464	Test(F) set
1.95723	1.79915	1.64926	1.95723	-1.37775	644.664	Test(F) set
1.96878	1.80847	1.65668	1.96878	-1.38226	645.864	Test(F) set
1.98032	1.81778	1.66408	1.98032	-1.38675	647.063	Test(F) set
1.99187	1.82708	1.67147	1.99187	-1.39123	648.263	Test(F) set
2.00342	1.83637	1.67885	2.00342	-1.39568	649.462	Test(F) set
2.01496	1.84566	1.68621	2.01496	-1.40012	650.662	Test(F) set
2.02651	1.85493	1.69356	2.02651	-1.40454	651.861	Test(F) set
2.03806	1.8642	1.70089	2.03806	-1.40895	653.061	Test(F) set
2.0496	1.87345	1.70821	2.0496	-1.41334	654.26	Test(F) set
2.06115	1.8827	1.71552	2.06115	-1.41771	655.459	Test(F) set
2.0727	1.89194	1.72281	2.0727	-1.42206	656.659	Test(F) set
2.08425	1.90117	1.73009	2.08425	-1.4264	657.858	Test(F) set
2.09579	1.91039	1.73735	2.09579	-1.43073	659.057	Test(F) set
2.10734	1.9196	1.7446	2.10734	-1.43503	660.256	Test(F) set
2.11889	1.92881	1.75184	2.11889	-1.43932	661.456	Test(F) set
2.13043	1.938	1.75906	2.13043	-1.4436	662.655	Test(F) set
2.14198	1.94719	1.76627	2.14198	-1.44786	663.854	Test(F) set
2.15353	1.95637	1.77347	2.15353	-1.4521	665.053	Test(F) set
2.16508	1.96554	1.78065	2.16508	-1.45632	666.252	Test(F) set
2.17662	1.9747	1.78782	2.17662	-1.46054	667.451	Test(F) set
2.18817	1.98385	1.79498	2.18817	-1.46473	668.65	Test(F) set
2.19972	1.99299	1.80212	2.19972	-1.46891	669.849	Test(F) set
2.21126	2.00213	1.80925	2.21126	-1.47307	671.048	Test(F) set
2.22281	2.01126	1.81637	2.22281	-1.47722	672.247	Test(F) set
2.23436	2.02038	1.82347	2.23436	-1.48136	673.446	Test(F) set
2.24591	2.02949	1.83056	2.24591	-1.48547	674.645	Test(F) set
2.25745	2.03859	1.83764	2.25745	-1.48958	675.843	Test(F) set
2.269	2.04768	1.8447	2.269	-1.49367	677.042	Test(F) set
2.28055	2.05677	1.85176	2.28055	-1.49774	678.241	Test(F) set
2.29209	2.06584	1.85879	2.29209	-1.5018	679.44	Test(F) set
2.30364	2.07491	1.86582	2.30364	-1.50584	680.638	Test(F) set
2.31519	2.08397	1.87283	2.31519	-1.50987	681.837	Test(F) set
2.32673	2.09303	1.87983	2.32673	-1.51388	683.036	Test(F) set
2.33828	2.10207	1.88682	2.33828	-1.51788	684.234	Test(F) set
2.34983	2.11111	1.8938	2.34983	-1.52187	685.433	Test(F) set
2.36138	2.12013	1.90076	2.36138	-1.52584	686.631	Test(F) set
2.37292	2.12915	1.90771	2.37292	-1.5298	687.83	Test(F) set
2.38447	2.13817	1.91465	2.38447	-1.53374	689.028	Test(F) set
2.39602	2.14717	1.92157	2.39602	-1.53767	690.227	Test(F) set
2.40756	2.15616	1.92848	2.40756	-1.54158	691.425	Test(F) set
2.41911	2.16515	1.93538	2.41911	-1.54548	692.623	Test(F) set
2.43066	2.17413	1.94227	2.43066	-1.54937	693.822	Test(F) set
2.44221	2.1831	1.94915	2.44221	-1.55324	695.02	Test(F) set
2.45375	2.19206	1.95601	2.45375	-1.5571	696.218	Test(F) set
2.4653	2.20102	1.96286	2.4653	-1.56094	697.417	Test(F) set
2.47685	2.20997	1.9697	2.47685	-1.56478	698.615	Test(F) set
2.48839	2.21891	1.97653	2.48839	-1.56859	699.813	Test(F) set
2.49994	2.22784	1.98334	2.49994	-1.5724	701.011	Test(F) set
2.51149	2.23676	1.99015	2.51149	-1.57619	702.209	Test(F) set
2.52303	2.24568	1.99694	2.52303	-1.57997	703.407	Test(F) set
2.53458	2.25458	2.00371	2.53458	-1.58373	704.605	Test(F) set
2.54613	2.26348	2.01048	2.54613	-1.58748	705.804	Test(F) set
2.55768	2.27238	2.01724	2.55768	-1.59122	707.002	Test(F) set
2.56922	2.28126	2.02398	2.56922	-1.59494	708.2	Test(F) set
2.58077	2.29014	2.03071	2.58077	-1.59865	709.398	Test(F) set
2.59232	2.29901	2.03743	2.59232	-1.60235	710.595	Test(F) set
2.60386	2.30787	2.04414	2.60386	-1.60604	711.793	Test(F) set
2.61541	2.31672	2.05084	2.61541	-1.60971	712.991	Test(F) set
2.62696	2.32557	2.05752	2.62696	-1.61337	714.189	Test(F) set
2.63851	2.33441	2.06419	2.63851	-1.61702	715.387	Test(F) set
2.65005	2.34324	2.07085	2.65005	-1.62066	716.585	Test(F) set
2.6616	2.35206	2.07751	2.6616	-1.62428	717.782	Test(F) set
2.67315	2.36087	2.08414	2.67315	-1.62789	718.98	Test(F) set
2.68469	2.36968	2.09077	2.68469	-1.63149	720.178	Test(F) set
2.69624	2.37848	2.09739	2.69624	-1.63507	721.376	Test(F) set
2.70779	2.38727	2.10399	2.70779	-1.63864	722.573	Test(F) set
2.71933	2.39606	2.11058	2.71933	-1.64221	723.771	Test(F) set
2.73088	2.40484	2.11717	2.73088	-1.64575	724.968	Test(F) set
2.74243	2.41361	2.12374	2.74243	-1.64929	726.166	Test(F) set
2.75398	2.42237	2.1303	2.75398	-1.65282	727.364	Test(F) set
2.76552	2.43113	2.13685	2.76552	-1.65633	728.561	Test(F) set
2.77707	2.43987	2.14338	2.77707	-1.65983	729.759	Test(F) set
2.78862	2.44861	2.14991	2.78862	-1.66332	730.956	Test(F) set
2.80016	2.45735	2.15642	2.80016	-1.66679	732.153	Test(F) set
2.81171	2.46607	2.16293	2.81171	-1.67026	733.351	Test(F) set
2.82326	2.47479	2.16942	2.82326	-1.67371	734.548	Test(F) set
2.83481	2.4835	2.1759	2.83481	-1.67716	735.746	Test(F) set
2.84635	2.4922	2.18238	2.84635	-1.68059	736.943	Test(F) set
2.8579	2.5009	2.18884	2.8579	-1.68401	738.14	Test(F) set
2.86945	2.50959	2.19529	2.86945	-1.68741	739.337	Test(F) set
2.88099	2.51827	2.20172	2.88099	-1.69081	740.535	Test(F) set
2.89254	2.52695	2.20815	2.89254	-1.69419	741.732	Test(F) set
2.90409	2.53561	2.21457	2.90409	-1.69757	742.929	Test(F) set
2.91564	2.54427	2.22098	2.91564	-1.70093	744.126	Test(F) set
2.92718	2.55293	2.22737	2.92718	-1.70428	745.323	Test(F) set
2.93873	2.56157	2.23376	2.93873	-1.70762	746.521	Test(F) set
2.95028	2.57021	2.24013	2.95028	-1.71095	747.718	Test(F) set
2.96182	2.57884	2.2465	2.96182	-1.71427	748.915	Test(F) set
2.97337	2.58747	2.25285	2.97337	-1.71758	750.112	Test(F) set
2.98492	2.59608	2.2592	2.98492	-1.72087	751.309	Test(F) set
2.99646	2.60469	2.26553	2.99646	-1.72416	752.506	Test(F) set
3.00801	2.6133	2.27185	3.00801	-1.72743	753.703	Test(F) set
3.01956	2.62189	2.27817	3.01956	-1.7307	754.9	Test(F) set
3.03111	2.63048	2.28447	3.03111	-1.73395	756.096	Test(F) set
3.04265	2.63906	2.29076	3.04265	-1.73719	757.293	Test(F) set
3.0542	2.64764	2.29704	3.0542	-1.74042	758.49	Test(F) set
3.06575	2.65621	2.30331	3.06575	-1.74365	759.687	Test(F) set
3.07729	2.66477	2.30957	3.07729	-1.74686	760.884	Test(F) set
3.08884	2.67332	2.31582	3.08884	-1.75006	762.08	Test(F) set
3.10039	2.68187	2.32207	3.10039	-1.75325	763.277	Test(F) set
3.11194	2.69041	2.3283	3.11194	-1.75643	764.474	Test(F) set
3.12348	2.69894	2.33452	3.12348	-1.7596	765.671	Test(F) set
3.13503	2.70747	2.34073	3.13503	-1.76276	766.867	Test(F) set
3.14658	2.71599	2.34693	3.14658	-1.76591	768.064	Test(F) set
3.15812	2.7245	2.35312	3.15812	-1.76905	769.261	Test(F) set
3.16967	2.73301	2.3593	3.16967	-1.77218	770.457	Test(F) set
3.18122	2.7415	2.36547	3.18122	-1.7753	771.654	Test(F) set
3.19276	2.75	2.37163	3.19276	-1.77841	772.85	Test(F) set
3.20431	2.75848	2.37778	3.20431	-1.7815	774.047	Test(F) set
3.21586	2.76696	2.38392	3.21586	-1.78459	775.243	Test(F) set
3.22741	2.77543	2.39006	3.22741	-1.78767	776.44	Test(F) set
3.23895	2.7839	2.39618	3.23895	-1.79074	777.636	Test(F) set
3.2505	2.79236	2.40229	3.2505	-1.7938	778.833	Test(F) set
3.26205	2.80081	2.40839	3.26205	-1.79685	780.029	Test(F) set
3.27359	2.80925	2.41449	3.27359	-1.7999	781.225	Test(F) set
3.28514	2.81769	2.42057	3.28514	-1.80293	782.422	Test(F) set
3.29669	2.82612	2.42664	3.29669	-1.80595	783.618	Test(F) set
3.30824	2.83455	2.43271	3.30824	-1.80896	784.814	Test(F) set
3.31978	2.84297	2.43876	3.31978	-1.81196	786.011	Test(F) set
3.33133	2.85138	2.44481	3.33133	-1.81496	787.207	Test(F) set
3.34288	2.85979	2.45084	3.34288	-1.81794	788.403	Test(F) set
3.35442	2.86818	2.45687	3.35442	-1.82092	789.599	Test(F) set
3.36597	2.87658	2.46288	3.36597	-1.82388	790.795	Test(F) set
3.37752	2.88496	2.46889	3.37752	-1.82684	791.991	Test(F) set
3.38906	2.89334	2.47489	3.38906	-1.82978	793.188	Test(F) set
3.40061	2.90171	2.48088	3.40061	-1.83272	794.384	Test(F) set
3.41216	2.91008	2.48686	3.41216	-1.83565	795.58	Test(F) set
3.42371	2.91844	2.49283	3.42371	-1.83857	796.776	Test(F) set
3.43525	2.92679	2.49879	3.43525	-1.84148	797.972	Test(F) set
3.4468	2.93514	2.50474	3.4468	-1.84438	799.168	Test(F) set
3.45835	2.94348	2.51068	3.45835	-1.84728	800.364	Test(F) set
3.46989	2.95181	2.51662	3.46989	-1.85016	801.56	Test(F) set
3.48144	2.96014	2.52254	3.48144	-1.85303	802.756	Test(F) set
3.49299	2.96846	2.52846	3.49299	-1.8559	803.952	Test(F) set
3.50454	2.97678	2.53436	3.50454	-1.85876	805.147	Test(F) set
3.51608	2.98509	2.54026	3.51608	-1.86161	806.343	Test(F) set
3.52763	2.99339	2.54615	3.52763	-1.86445	807.539	Test(F) set
3.53918	3.00168	2.55203	3.53918	-1.86728	808.735	Test(F) set
3.55072	3.00997	2.5579	3.55072	-1.8701	809.931	Test(F) set
3.56227	3.01826	2.56376	3.56227	-1.87291	811.126	Test(F) set
3.57382	3.02653	2.56961	3.57382	-1.87572	812.322	Test(F) set
3.58537	3.0348	2.57545	3.58537	-1.87852	813.518	Test(F) set
3.59691	3.04307	2.58129	3.59691	-1.88131	814.714	Test(F) set
3.60846	3.05132	2.58711	3.60846	-1.88409	815.909	Test(F) set
3.62001	3.05958	2.59293	3.62001	-1.88686	817.105	Test(F) set
3.63155	3.06782	2.59874	3.63155	-1.88962	818.301	Test(F) set
3.6431	3.07606	2.60454	3.6431	-1.89238	819.496	Test(F) set
3.65465	3.08429	2.61033	3.65465	-1.89512	820.692	Test(F) set
3.66619	3.09252	2.61611	3.66619	-1.89786	821.887	Test(F) set
3.67774	3.10074	2.62189	3.67774	-1.90059	823.083	Test(F) set
3.68929	3.10896	2.62765	3.68929	-1.90331	824.278	Test(F) set
3.70084	3.11716	2.63341	3.70084	-1.90603	825.474	Test(F) set
3.71238	3.12537	2.63915	3.71238	-1.90873	826.669	Test(F) set
3.72393	3.13356	2.64489	3.72393	-1.91143	827.865	Test(F) set
3.73548	3.14175	2.65062	3.73548	-1.91412	829.06	Test(F) set
3.74702	3.14994	2.65635	3.74702	-1.9168	830.256	Test(F) set
3.75857	3.15812	2.66206	3.75857	-1.91948	831.451	Test(F) set
3.77012	3.16629	2.66776	3.77012	-1.92214	832.646	Test(F) set
3.78167	3.17445	2.67346	3.78167	-1.9248	833.842	Test(F) set
3.79321	3.18261	2.67915	3.79321	-1.92745	835.037	Test(F) set
3.80476	3.19077	2.68483	3.80476	-1.93009	836.232	Test(F) set
3.81631	3.19892	2.6905	3.81631	-1.93273	837.427	Test(F) set
3.82785	3.20706	2.69616	3.82785	-1.93536	838.623	Test(F) set
3.8394	3.21519	2.70182	3.8394	-1.93798	839.818	Test(F) set
3.85095	3.22332	2.70746	3.85095	-1.94059	841.013	Test(F) set
3.86249	3.23145	2.7131	3.86249	-1.94319	842.208	Test(F) set
3.87404	3.23956	2.71873	3.87404	-1.94579	843.403	Test(F) set
3.88559	3.24768	2.72435	3.88559	-1.94838	844.599	Test(F) set
3.89714	3.25578	2.72997	3.89714	-1.95096	845.794	Test(F) set
3.90868	3.26388	2.73557	3.90868	-1.95353	846.989	Test(F) set
3.92023	3.27198	2.74117	3.92023	-1.9561	848.184	Test(F) set
3.93178	3.28007	2.74676	3.93178	-1.95866	849.379	Test(F) set
3.94332	3.28815	2.75234	3.94332	-1.96121	850.574	Test(F) set
3.95487	3.29623	2.75791	3.95487	-1.96375	851.769	Test(F) set
3.96642	3.3043	2.76348	3.96642	-1.96629	852.964	Test(F) set
3.97797	3.31236	2.76904	3.97797	-1.96882	854.159	Test(F) set
3.98951	3.32042	2.77458	3.98951	-1.97134	855.354	Test(F) set
4.00106	3.32847	2.78013	4.00106	-1.97386	856.549	Test(F) set
4.01261	3.33652	2.78566	4.01261	-1.97636	857.744	Test(F) set
4.02415	3.34456	2.79118	4.02415	-1.97886	858.938	Test(F) set
4.0357	3.3526	2.7967	4.0357	-1.98136	860.133	Test(F) set
-1.21822	-1.24275	-1.2593	-1.21822	1.26404	312.95	Test(I) set
-1.20667	-1.22916	-1.24354	-1.20667	1.24369	314.166	Test(I) set
-1.19512	-1.21561	-1.22784	-1.19512	1.22351	315.382	Test(I) set
-1.18357	-1.20208	-1.2122	-1.18357	1.20348	316.597	Test(I) set
-1.17203	-1.18858	-1.19663	-1.17203	1.18363	317.813	Test(I) set
-1.16048	-1.17511	-1.18113	-1.16048	1.16392	319.029	Test(I) set
-1.14893	-1.16166	-1.16568	-1.14893	1.14438	320.244	Test(I) set
-1.13739	-1.14824	-1.15029	-1.13739	1.125	321.459	Test(I) set
-1.12584	-1.13485	-1.13497	-1.12584	1.10576	322.675	Test(I) set
-1.11429	-1.12148	-1.11971	-1.11429	1.08668	323.89	Test(I) set
-1.10275	-1.10814	-1.10451	-1.10275	1.06775	325.105	Test(I) set
-1.0912	-1.09483	-1.08936	-1.0912	1.04897	326.32	Test(I) set
-1.07965	-1.08154	-1.07428	-1.07965	1.03033	327.534	Test(I) set
-1.0681	-1.06828	-1.05926	-1.0681	1.01184	328.749	Test(I) set
-1.05656	-1.05504	-1.04429	-1.05656	0.993494	329.964	Test(I) set
-1.04501	-1.04183	-1.02938	-1.04501	0.975289	331.178	Test(I) set
-1.03346	-1.02865	-1.01453	-1.03346	0.957223	332.393	Test(I) set
-1.02192	-1.01549	-0.999739	-1.02192	0.939296	333.607	Test(I) set
-1.01037	-1.00236	-0.985002	-1.01037	0.921506	334.821	Test(I) set
-0.998822	-0.989247	-0.970321	-0.998822	0.903851	336.035	Test(I) set
-0.987274	-0.976163	-0.955696	-0.987274	0.88633	337.249	Test(I) set
-0.975727	-0.963104	-0.941126	-0.975727	0.868941	338.463	Test(I) set
-0.96418	-0.950069	-0.926611	-0.96418	0.851683	339.677	Test(I) set
-0.952633	-0.937059	-0.91215	-0.952633	0.834554	340.891	Test(I) set
-0.941086	-0.924073	-0.897744	-0.941086	0.817552	342.104	Test(I) set
-0.929539	-0.911111	-0.883391	-0.929539	0.800678	343.318	Test(I) set
-0.917992	-0.898173	-0.869091	-0.917992	0.783928	344.531	Test(I) set
-0.906445	-0.885259	-0.854844	-0.906445	0.767302	345.745	Test(I) set
-0.894898	-0.872369	-0.84065	-0.894898	0.750798	346.958	Test(I) set
-0.883351	-0.859503	-0.826508	-0.883351	0.734415	348.171	Test(I) set
-0.871804	-0.84666	-0.812417	-0.871804	0.718152	349.384	Test(I) set
-0.860257	-0.833841	-0.798378	-0.860257	0.702007	350.597	Test(I) set
-0.84871	-0.821045	-0.78439	-0.84871	0.685979	351.81	Test(I) set
-0.837163	-0.808272	-0.770452	-0.837163	0.670066	353.023	Test(I) set
-0.825615	-0.795522	-0.756565	-0.825615	0.654268	354.236	Test(I) set
-0.814068	-0.782795	-0.742727	-0.814068	0.638584	355.448	Test(I) set
-0.802521	-0.770091	-0.728939	-0.802521	0.623011	356.661	Test(I) set
-0.790974	-0.757409	-0.715201	-0.790974	0.607549	357.873	Test(I) set
-0.779427	-0.74475	-0.701511	-0.779427	0.592197	359.086	Test(I) set
-0.76788	-0.732114	-0.687869	-0.76788	0.576953	360.298	Test(I) set
-0.756333	-0.7195	-0.674276	-0.756333	0.561817	361.51	Test(I) set
-0.744786	-0.706908	-0.66073	-0.744786	0.546787	362.722	Test(I) set
-0.733239	-0.694338	-0.647232	-0.733239	0.531862	363.934	Test(I) set
-0.721692	-0.68179	-0.63378	-0.721692	0.517041	365.146	Test(I) set
-0.710145	-0.669263	-0.620376	-0.710145	0.502323	366.358	Test(I) set
-0.698598	-0.656759	-0.607018	-0.698598	0.487707	367.57	Test(I) set
-0.687051	-0.644276	-0.593707	-0.687051	0.473192	368.781	Test(I) set
-0.675504	-0.631815	-0.580441	-0.675504	0.458776	369.993	Test(I) set
-0.663956	-0.619375	-0.56722	-0.663956	0.444459	371.204	Test(I) set
-0.652409	-0.606956	-0.554045	-0.652409	0.43024	372.416	Test(I) set
-0.640862	-0.594559	-0.540915	-0.640862	0.416118	373.627	Test(I) set
-0.629315	-0.582182	-0.527829	-0.629315	0.402091	374.838	Test(I) set
-0.617768	-0.569827	-0.514788	-0.617768	0.388159	376.05	Test(I) set
-0.606221	-0.557492	-0.50179	-0.606221	0.374321	377.261	Test(I) set
-0.594674	-0.545179	-0.488836	-0.594674	0.360576	378.472	Test(I) set
-0.583127	-0.532885	-0.475926	-0.583127	0.346923	379.683	Test(I) set
-0.57158	-0.520613	-0.463059	-0.57158	0.33336	380.893	Test(I) set
-0.560033	-0.50836	-0.450234	-0.560033	0.319888	382.104	Test(I) set
-0.548486	-0.496129	-0.437452	-0.548486	0.306505	383.315	Test(I) set
-0.536939	-0.483917	-0.424713	-0.536939	0.293211	384.526	Test(I) set
-0.525392	-0.471725	-0.412015	-0.525392	0.280004	385.736	Test(I) set
-0.513845	-0.459554	-0.399359	-0.513845	0.266883	386.947	Test(I) set
-0.502298	-0.447402	-0.386744	-0.502298	0.253848	388.157	Test(I) set
-0.49075	-0.435271	-0.374171	-0.49075	0.240899	389.367	Test(I) set
-0.479203	-0.423159	-0.361638	-0.479203	0.228033	390.578	Test(I) set
-0.467656	-0.411066	-0.349147	-0.467656	0.21525	391.788	Test(I) set
-0.456109	-0.398994	-0.336695	-0.456109	0.20255	392.998	Test(I) set
-0.444562	-0.38694	-0.324284	-0.444562	0.189932	394.208	Test(I) set
-0.433015	-0.374906	-0.311912	-0.433015	0.177395	395.418	Test(I) set
-0.421468	-0.362892	-0.29958	-0.421468	0.164937	396.628	Test(I) set
-0.409921	-0.350896	-0.287287	-0.409921	0.152559	397.837	Test(I) set
-0.398374	-0.33892	-0.275034	-0.398374	0.14026	399.047	Test(I) set
-0.386827	-0.326962	-0.262819	-0.386827	0.128038	400.257	Test(I) set
-0.37528	-0.315024	-0.250643	-0.37528	0.115894	401.466	Test(I) set
-0.363733	-0.303104	-0.238505	-0.363733	0.103826	402.676	Test(I) set
-0.352186	-0.291203	-0.226406	-0.352186	0.0918336	403.885	Test(I) set
-0.340639	-0.279321	-0.214344	-0.340639	0.0799161	405.095	Test(I) set
-0.329091	-0.267457	-0.20232	-0.329091	0.0680729	406.304	Test(I) set
-0.317544	-0.255612	-0.190333	-0.317544	0.0563033	407.513	Test(I) set
-0.305997	-0.243785	-0.178383	-0.305997	0.0446065	408.722	Test(I) set
-0.29445	-0.231976	-0.166471	-0.29445	0.032982	409.931	Test(I) set
-0.282903	-0.220186	-0.154595	-0.282903	0.021429	411.14	Test(I) set
-0.271356	-0.208413	-0.142755	-0.271356	0.00994684	412.349	Test(I) set
-0.259809	-0.196659	-0.130952	-0.259809	-0.00146507	413.558	Test(I) set
-0.248262	-0.184923	-0.119185	-0.248262	-0.0128074	414.767	Test(I) set
-0.236715	-0.173204	-0.107453	-0.236715	-0.0240808	415.976	Test(I) set
-0.225168	-0.161504	-0.0957576	-0.225168	-0.0352858	417.184	Test(I) set
-0.213621	-0.149821	-0.0840973	-0.213621	-0.0464232	418.393	Test(I) set
-0.202074	-0.138155	-0.0724721	-0.202074	-0.0574934	419.601	Test(I) set
-0.190527	-0.126508	-0.0608819	-0.190527	-0.0684972	420.81	Test(I) set
-0.17898	-0.114877	-0.0493264	-0.17898	-0.0794351	422.018	Test(I) set
-0.167433	-0.103265	-0.0378055	-0.167433	-0.0903076	423.226	Test(I) set
-0.155885	-0.0916691	-0.0263189	-0.155885	-0.101116	424.435	Test(I) set
-0.144338	-0.0800908	-0.0148665	-0.144338	-0.111859	425.643	Test(I) set
-0.132791	-0.0685297	-0.00344797	-0.132791	-0.122539	426.851	Test(I) set
-0.121244	-0.0569856	0.00793681	-0.121244	-0.133156	428.059	Test(I) set
-0.109697	-0.0454586	0.019288	-0.109697	-0.143711	429.267	Test(I) set
-0.0981501	-0.0339485	0.030606	-0.0981501	-0.154204	430.475	Test(I) set
-0.086603	-0.0224553	0.0418907	-0.086603	-0.164635	431.683	Test(I) set
-0.075056	-0.0109788	0.0531425	-0.075056	-0.175006	432.891	Test(I) set
-0.0635089	0.000480869	0.0643616	-0.0635089	-0.185316	434.098	Test(I) set
-0.0519618	0.0119239	0.0755481	-0.0519618	-0.195567	435.306	Test(I) set
-0.0404147	0.0233504	0.0867022	-0.0404147	-0.205758	436.514	Test(I) set
-0.0288677	0.0347604	0.0978241	-0.0288677	-0.215891	437.721	Test(I) set
-0.0173206	0.046154	0.108914	-0.0173206	-0.225965	438.929	Test(I) set
-0.00577353	0.0575312	0.119972	-0.00577353	-0.235981	440.136	Test(I) set
0.00577353	0.0688921	0.130999	0.00577353	-0.245941	441.343	Test(I) set
0.0173206	0.0802368	0.141994	0.0173206	-0.255843	442.551	Test(I) set
0.0288677	0.0915654	0.152957	0.0288677	-0.26569	443.758	Test(I) set
0.0404147	0.102878	0.16389	0.0404147	-0.27548	444.965	Test(I) set
0.0519618	0.114174	0.174792	0.0519618	-0.285215	446.172	Test(I) set
0.0635089	0.125455	0.185663	0.0635089	-0.294896	447.379	Test(I) set
0.075056	0.13672	0.196503	0.075056	-0.304522	448.586	Test(I) set
0.086603	0.147968	0.207313	0.086603	-0.314094	449.793	Test(I) set
0.0981501	0.159201	0.218093	0.0981501	-0.323612	451	Test(I) set
0.109697	0.170419	0.228842	0.109697	-0.333078	452.207	Test(I) set
0.121244	0.181621	0.239562	0.121244	-0.342491	453.413	Test(I) set
0.132791	0.192807	0.250252	0.132791	-0.351852	454.62	Test(I) set
0.144338	0.203978	0.260912	0.144338	-0.361161	455.827	Test(I) set
0.155885	0.215133	0.271543	0.155885	-0.370419	457.033	Test(I) set
0.167433	0.226273	0.282145	0.167433	-0.379626	458.24	Test(I) set
0.17898	0.237398	0.292718	0.17898	-0.388782	459.446	Test(I) set
0.190527	0.248507	0.303262	0.190527	-0.397889	460.653	Test(I) set
0.202074	0.259601	0.313777	0.202074	-0.406945	461.859	Test(I) set
0.213621	0.270681	0.324263	0.213621	-0.415953	463.065	Test(I) set
0.225168	0.281745	0.334721	0.225168	-0.424912	464.271	Test(I) set
0.236715	0.292794	0.345151	0.236715	-0.433822	465.478	Test(I) set
0.248262	0.303828	0.355552	0.248262	-0.442685	466.684	Test(I) set
0.259809	0.314848	0.365926	0.259809	-0.451499	467.89	Test(I) set
0.271356	0.325852	0.376271	0.271356	-0.460267	469.096	Test(I) set
0.282903	0.336842	0.386589	0.282903	-0.468987	470.302	Test(I) set
0.29445	0.347817	0.396879	0.29445	-0.477661	471.508	Test(I) set
0.305997	0.358778	0.407142	0.305997	-0.486289	472.713	Test(I) set
0.317544	0.369724	0.417378	0.317544	-0.494871	473.919	Test(I) set
0.329091	0.380655	0.427587	0.329091	-0.503408	475.125	Test(I) set
0.340639	0.391572	0.437768	0.340639	-0.5119	476.33	Test(I) set
0.352186	0.402475	0.447923	0.352186	-0.520347	477.536	Test(I) set
0.363733	0.413363	0.458051	0.363733	-0.528749	478.742	Test(I) set
0.37528	0.424237	0.468153	0.37528	-0.537108	479.947	Test(I) set
0.386827	0.435097	0.478228	0.386827	-0.545423	481.153	Test(I) set
0.398374	0.445943	0.488277	0.398374	-0.553695	482.358	Test(I) set
0.409921	0.456774	0.4983	0.409921	-0.561923	483.563	Test(I) set
0.421468	0.467592	0.508296	0.421468	-0.570109	484.769	Test(I) set
0.433015	0.478395	0.518267	0.433015	-0.578253	485.974	Test(I) set
0.444562	0.489185	0.528212	0.444562	-0.586355	487.179	Test(I) set
0.456109	0.49996	0.538132	0.456109	-0.594415	488.384	Test(I) set
0.467656	0.510722	0.548026	0.467656	-0.602434	489.589	Test(I) set
0.479203	0.52147	0.557895	0.479203	-0.610412	490.794	Test(I) set
0.49075	0.532204	0.567738	0.49075	-0.618349	491.999	Test(I) set
0.502298	0.542925	0.577557	0.502298	-0.626245	493.204	Test(I) set
0.513845	0.553632	0.58735	0.513845	-0.634102	494.409	Test(I) set
0.525392	0.564325	0.597119	0.525392	-0.641919	495.614	Test(I) set
0.536939	0.575005	0.606863	0.536939	-0.649696	496.818	Test(I) set
0.548486	0.585671	0.616582	0.548486	-0.657434	498.023	Test(I) set
0.560033	0.596324	0.626277	0.560033	-0.665134	499.228	Test(I) set
0.57158	0.606964	0.635948	0.57158	-0.672794	500.432	Test(I) set
0.583127	0.61759	0.645594	0.583127	-0.680417	501.637	Test(I) set
0.594674	0.628203	0.655217	0.594674	-0.688001	502.841	Test(I) set
0.606221	0.638803	0.664815	0.606221	-0.695548	504.046	Test(I) set
0.617768	0.649389	0.67439	0.617768	-0.703057	505.25	Test(I) set
0.629315	0.659962	0.68394	0.629315	-0.710529	506.454	Test(I) set
0.640862	0.670523	0.693468	0.640862	-0.717964	507.659	Test(I) set
0.652409	0.68107	0.702971	0.652409	-0.725362	508.863	Test(I) set
0.663956	0.691604	0.712452	0.663956	-0.732725	510.067	Test(I) set
0.675504	0.702126	0.721909	0.675504	-0.740051	511.271	Test(I) set
0.687051	0.712634	0.731343	0.687051	-0.747341	512.475	Test(I) set
0.698598	0.72313	0.740753	0.698598	-0.754596	513.679	Test(I) set
0.710145	0.733613	0.750141	0.710145	-0.761815	514.883	Test(I) set
0.721692	0.744083	0.759506	0.721692	-0.768999	516.087	Test(I) set
0.733239	0.75454	0.768849	0.733239	-0.776149	517.291	Test(I) set
0.744786	0.764985	0.778169	0.744786	-0.783264	518.495	Test(I) set
0.756333	0.775417	0.787466	0.756333	-0.790344	519.699	Test(I) set
0.76788	0.785837	0.796741	0.76788	-0.797391	520.903	Test(I) set
0.779427	0.796244	0.805994	0.779427	-0.804404	522.106	Test(I) set
0.790974	0.806639	0.815224	0.790974	-0.811383	523.31	Test(I) set
0.802521	0.817021	0.824433	0.802521	-0.818329	524.514	Test(I) set
0.814068	0.827391	0.833619	0.814068	-0.825242	525.717	Test(I) set
0.825615	0.837748	0.842784	0.825615	-0.832122	526.921	Test(I) set
0.837163	0.848093	0.851927	0.837163	-0.83897	528.124	Test(I) set
0.84871	0.858426	0.861048	0.84871	-0.845785	529.328	Test(I) set
0.860257	0.868747	0.870148	0.860257	-0.852568	530.531	Test(I) set
0.871804	0.879056	0.879226	0.871804	-0.859319	531.735	Test(I) set
0.883351	0.889352	0.888283	0.883351	-0.866038	532.938	Test(I) set
0.894898	0.899637	0.897319	0.894898	-0.872726	534.141	Test(I) set
0.906445	0.909909	0.906333	0.906445	-0.879382	535.344	Test(I) set
0.917992	0.920169	0.915327	0.917992	-0.886008	536.547	Test(I) set
0.929539	0.930418	0.9243	0.929539	-0.892603	537.751	Test(I) set
0.941086	0.940654	0.933251	0.941086	-0.899167	538.954	Test(I) set
0.952633	0.950879	0.942182	0.952633	-0.9057	540.157	Test(I) set
0.96418	0.961091	0.951093	0.96418	-0.912204	541.36	Test(I) set
0.975727	0.971292	0.959983	0.975727	-0.918678	542.563	Test(I) set
0.987274	0.981482	0.968852	0.987274	-0.925122	543.765	Test(I) set
0.998822	0.991659	0.977701	0.998822	-0.931536	544.968	Test(I) set
1.01037	1.00183	0.98653	1.01037	-0.937921	546.171	Test(I) set
1.02192	1.01198	0.995338	1.02192	-0.944276	547.374	Test(I) set
1.03346	1.02212	1.00413	1.03346	-0.950603	548.577	Test(I) set
1.04501	1.03225	1.0129	1.04501	-0.956901	549.779	Test(I) set
1.05656	1.04237	1.02164	1.05656	-0.963171	550.982	Test(I) set
1.0681	1.05248	1.03037	1.0681	-0.969412	552.184	Test(I) set
1.07965	1.06258	1.03908	1.07965	-0.975625	553.387	Test(I) set
-3.92023	-6.53479	-13.5704	-3.92023	117.932	19.1845	Test(B) set
-3.90868	-6.46922	-13.2031	-3.90868	106.872	20.6602	Test(B) set
-3.89714	-6.40658	-12.8678	-3.89714	97.656	22.1187	Test(B) set
-3.88559	-6.34649	-12.5593	-3.88559	89.8577	23.5622	Test(B) set
-3.87404	-6.28868	-12.2737	-3.87404	83.1734	24.9928	Test(B) set
-3.86249	-6.23289	-12.0078	-3.86249	77.3804	26.4118	Test(B) set
-3.85095	-6.17894	-11.7591	-3.85095	72.3115	27.8205	Test(B) set
-3.8394	-6.12664	-11.5255	-3.8394	67.839	29.2201	Test(B) set
-3.82785	-6.07587	-11.3052	-3.82785	63.8634	30.6113	Test(B) set
-3.81631	-6.02648	-11.0969	-3.81631	60.3063	31.995	Test(B) set
-3.80476	-5.97838	-10.8992	-3.80476	57.1049	33.3718	Test(B) set
-3.79321	-5.93147	-10.7112	-3.79321	54.2084	34.7422	Test(B) set
-3.78167	-5.88566	-10.5319	-3.78167	51.5752	36.1068	Test(B) set
-3.77012	-5.84088	-10.3606	-3.77012	49.171	37.466	Test(B) set
-3.75857	-5.79707	-10.1966	-3.75857	46.9671	38.8202	Test(B) set
-3.74702	-5.75415	-10.0393	-3.74702	44.9396	40.1698	Test(B) set
-3.73548	-5.71209	-9.88811	-3.73548	43.068	41.5149	Test(B) set
-3.72393	-5.67083	-9.74266	-3.72393	41.335	42.856	Test(B) set
-3.71238	-5.63033	-9.60251	-3.71238	39.7258	44.1932	Test(B) set
-3.70084	-5.59054	-9.46728	-3.70084	38.2276	45.5268	Test(B) set
-3.68929	-5.55144	-9.33663	-3.68929	36.8293	46.857	Test(B) set
-3.67774	-5.51298	-9.21027	-3.67774	35.5212	48.1839	Test(B) set
-3.66619	-5.47513	-9.08792	-3.66619	34.2949	49.5078	Test(B) set
-3.65465	-5.43788	-8.96933	-3.65465	33.1429	50.8288	Test(B) set
-3.6431	-5.40118	-8.85428	-3.6431	32.0586	52.1471	Test(B) set
-3.63155	-5.36502	-8.74257	-3.63155	31.0363	53.4627	Test(B) set
-3.62001	-5.32937	-8.63401	-3.62001	30.0708	54.7758	Test(B) set
-3.60846	-5.29422	-8.52842	-3.60846	29.1575	56.0866	Test(B) set
-3.59691	-5.25953	-8.42565	-3.59691	28.2923	57.395	Test(B) set
-3.58537	-5.2253	-8.32555	-3.58537	27.4714	58.7013	Test(B) set
-3.57382	-5.19151	-8.22798	-3.57382	26.6916	60.0055	Test(B) set
-3.56227	-5.15813	-8.13282	-3.56227	25.9498	61.3076	Test(B) set
-3.55072	-5.12516	-8.03995	-3.55072	25.2433	62.6079	Test(B) set
-3.53918	-5.09258	-7.94927	-3.53918	24.5697	63.9063	Test(B) set
-3.52763	-5.06038	-7.86068	-3.52763	23.9267	65.2029	Test(B) set
-3.51608	-5.02854	-7.77407	-3.51608	23.3123	66.4978	Test(B) set
-3.50454	-4.99705	-7.68937	-3.50454	22.7246	67.791	Test(B) set
-3.49299	-4.9659	-7.60649	-3.49299	22.1619	69.0826	Test(B) set
-3.48144	-4.93509	-7.52536	-3.48144	21.6227	70.3727	Test(B) set
-3.46989	-4.90459	-7.4459	-3.46989	21.1054	71.6613	Test(B) set
-3.45835	-4.8744	-7.36804	-3.45835	20.6089	72.9485	Test(B) set
-3.4468	-4.84451	-7.29173	-3.4468	20.1318	74.2343	Test(B) set
-3.43525	-4.81492	-7.21689	-3.43525	19.6731	75.5187	Test(B) set
-3.42371	-4.7856	-7.14349	-3.42371	19.2317	76.8018	Test(B) set
-3.41216	-4.75656	-7.07145	-3.41216	18.8066	78.0837	Test(B) set
-3.40061	-4.72779	-7.00074	-3.40061	18.397	79.3643	Test(B) set
-3.38906	-4.69928	-6.9313	-3.38906	18.002	80.6438	Test(B) set
-3.37752	-4.67103	-6.86309	-3.37752	17.6209	81.922	Test(B) set
-3.36597	-4.64302	-6.79607	-3.36597	17.253	83.1992	Test(B) set
-3.35442	-4.61525	-6.73019	-3.35442	16.8974	84.4753	Test(B) set
-3.34288	-4.58771	-6.66542	-3.34288	16.5538	85.7503	Test(B) set
-3.33133	-4.56041	-6.60172	-3.33133	16.2214	87.0242	Test(B) set
-3.31978	-4.53333	-6.53906	-3.31978	15.8997	88.2972	Test(B) set
-3.30824	-4.50646	-6.4774	-3.30824	15.5883	89.5692	Test(B) set
-3.29669	-4.47981	-6.41671	-3.29669	15.2866	90.8402	Test(B) set
-3.28514	-4.45336	-6.35696	-3.28514	14.9941	92.1103	Test(B) set
-3.27359	-4.42712	-6.29812	-3.27359	14.7106	93.3795	Test(B) set
-3.26205	-4.40107	-6.24017	-3.26205	14.4355	94.6478	Test(B) set
-3.2505	-4.37522	-6.18307	-3.2505	14.1684	95.9152	Test(B) set
-3.23895	-4.34956	-6.12681	-3.23895	13.9092	97.1818	Test(B) set
-3.22741	-4.32408	-6.07136	-3.22741	13.6573	98.4476	Test(B) set
-3.21586	-4.29878	-6.0167	-3.21586	13.4125	99.7126	Test(B) set
-3.20431	-4.27367	-5.9628	-3.20431	13.1745	100.977	Test(B) set
-3.19276	-4.24872	-5.90964	-3.19276	12.9431	102.24	Test(B) set
-3.18122	-4.22395	-5.85721	-3.18122	12.7179	103.503	Test(B) set
-3.16967	-4.19934	-5.80548	-3.16967	12.4987	104.765	Test(B) set
-3.15812	-4.1749	-5.75444	-3.15812	12.2853	106.026	Test(B) set
-3.14658	-4.15061	-5.70406	-3.14658	12.0774	107.286	Test(B) set
-3.13503	-4.12649	-5.65434	-3.13503	11.8748	108.546	Test(B) set
-3.12348	-4.10252	-5.60524	-3.12348	11.6774	109.805	Test(B) set
-3.11194	-4.0787	-5.55677	-3.11194	11.4849	111.064	Test(B) set
-3.10039	-4.05502	-5.50889	-3.10039	11.2972	112.322	Test(B) set
-3.08884	-4.0315	-5.46161	-3.08884	11.114	113.579	Test(B) set
-3.07729	-4.00811	-5.4149	-3.07729	10.9353	114.835	Test(B) set
-3.06575	-3.98487	-5.36874	-3.06575	10.7608	116.091	Test(B) set
-3.0542	-3.96176	-5.32314	-3.0542	10.5904	117.347	Test(B) set
-3.04265	-3.93879	-5.27806	-3.04265	10.424	118.602	Test(B) set
-3.03111	-3.91596	-5.23351	-3.03111	10.2614	119.856	Test(B) set
-3.01956	-3.89325	-5.18947	-3.01956	10.1025	121.109	Test(B) set
-3.00801	-3.87067	-5.14592	-3.00801	9.94716	122.362	Test(B) set
-2.99646	-3.84822	-5.10286	-2.99646	9.79528	123.615	Test(B) set
-2.98492	-3.8259	-5.06028	-2.98492	9.64674	124.867	Test(B) set
-2.97337	-3.80369	-5.01816	-2.97337	9.50143	126.118	Test(B) set
-2.96182	-3.78161	-4.9765	-2.96182	9.35925	127.369	Test(B) set
-2.95028	-3.75965	-4.93528	-2.95028	9.22009	128.62	Test(B) set
-2.93873	-3.7378	-4.8945	-2.93873	9.08386	129.87	Test(B) set
-2.92718	-3.71606	-4.85415	-2.92718	8.95047	131.119	Test(B) set
-2.91564	-3.69444	-4.81421	-2.91564	8.81982	132.368	Test(B) set
-2.90409	-3.67293	-4.77468	-2.90409	8.69185	133.617	Test(B) set
-2.89254	-3.65153	-4.73556	-2.89254	8.56646	134.865	Test(B) set
-2.88099	-3.63024	-4.69683	-2.88099	8.44358	136.112	Test(B) set
-2.86945	-3.60905	-4.65848	-2.86945	8.32313	137.359	Test(B) set
-2.8579	-3.58797	-4.62051	-2.8579	8.20504	138.606	Test(B) set
-2.84635	-3.56699	-4.58292	-2.84635	8.08925	139.852	Test(B) set
-2.83481	-3.54612	-4.54568	-2.83481	7.97568	141.098	Test(B) set
-2.82326	-3.52534	-4.5088	-2.82326	7.86428	142.343	Test(B) set
-2.81171	-3.50466	-4.47228	-2.81171	7.75497	143.588	Test(B) set
-2.80016	-3.48408	-4.43609	-2.80016	7.64771	144.833	Test(B) set
-2.78862	-3.4636	-4.40024	-2.78862	7.54244	146.077	Test(B) set
-2.77707	-3.44321	-4.36472	-2.77707	7.4391	147.321	Test(B) set
-2.76552	-3.42291	-4.32953	-2.76552	7.33764	148.564	Test(B) set
-2.75398	-3.4027	-4.29465	-2.75398	7.238	149.807	Test(B) set
-2.74243	-3.38259	-4.26009	-2.74243	7.14015	151.049	Test(B) set
-2.73088	-3.36256	-4.22583	-2.73088	7.04403	152.292	Test(B) set
-2.71933	-3.34263	-4.19188	-2.71933	6.94959	153.533	Test(B) set
-2.70779	-3.32278	-4.15822	-2.70779	6.8568	154.775	Test(B) set
-2.69624	-3.30302	-4.12486	-2.69624	6.7656	156.016	Test(B) set
-2.68469	-3.28334	-4.09178	-2.68469	6.67597	157.257	Test(B) set
-2.67315	-3.26375	-4.05898	-2.67315	6.58785	158.497	Test(B) set
-2.6616	-3.24423	-4.02646	-2.6616	6.50121	159.737	Test(B) set
-2.65005	-3.22481	-3.99421	-2.65005	6.41602	160.977	Test(B) set
-2.63851	-3.20546	-3.96223	-2.63851	6.33224	162.216	Test(B) set
-2.62696	-3.18619	-3.93051	-2.62696	6.24983	163.455	Test(B) set
-2.61541	-3.167	-3.89905	-2.61541	6.16876	164.694	Test(B) set
-2.60386	-3.14789	-3.86784	-2.60386	6.089	165.932	Test(B) set
-2.59232	-3.12885	-3.83689	-2.59232	6.01051	167.17	Test(B) set
-2.58077	-3.10989	-3.80618	-2.58077	5.93327	168.408	Test(B) set
-2.56922	-3.09101	-3.77572	-2.56922	5.85725	169.645	Test(B) set
-2.55768	-3.0722	-3.74549	-2.55768	5.78241	170.882	Test(B) set
-2.54613	-3.05346	-3.7155	-2.54613	5.70874	172.119	Test(B) set
-2.53458	-3.0348	-3.68574	-2.53458	5.63619	173.356	Test(B) set
-2.52303	-3.01621	-3.65621	-2.52303	5.56476	174.592	Test(B) set
-2.51149	-2.99768	-3.62691	-2.51149	5.49441	175.828	Test(B) set
-2.49994	-2.97923	-3.59782	-2.49994	5.42511	177.063	Test(B) set
-2.48839	-2.96085	-3.56896	-2.48839	5.35685	178.299	Test(B) set
-2.47685	-2.94254	-3.5403	-2.47685	5.2896	179.534	Test(B) set
-2.4653	-2.92429	-3.51186	-2.4653	5.22334	180.769	Test(B) set
-2.45375	-2.90611	-3.48363	-2.45375	5.15805	182.003	Test(B) set
-2.44221	-2.888	-3.4556	-2.44221	5.0937	183.237	Test(B) set
-2.43066	-2.86995	-3.42778	-2.43066	5.03028	184.471	Test(B) set
-2.41911	-2.85197	-3.40015	-2.41911	4.96777	185.705	Test(B) set
-2.40756	-2.83405	-3.37272	-2.40756	4.90614	186.938	Test(B) set
-2.39602	-2.8162	-3.34549	-2.39602	4.84538	188.171	Test(B) set
-2.38447	-2.7984	-3.31844	-2.38447	4.78547	189.404	Test(B) set
-2.37292	-2.78067	-3.29159	-2.37292	4.72639	190.637	Test(B) set
-2.36138	-2.76301	-3.26492	-2.36138	4.66813	191.869	Test(B) set
-2.34983	-2.7454	-3.23843	-2.34983	4.61067	193.102	Test(B) set
-2.33828	-2.72785	-3.21213	-2.33828	4.55398	194.333	Test(B) set
-2.32673	-2.71036	-3.186	-2.32673	4.49807	195.565	Test(B) set
-2.31519	-2.69293	-3.16005	-2.31519	4.4429	196.796	Test(B) set
-2.30364	-2.67556	-3.13427	-2.30364	4.38847	198.028	Test(B) set
-2.29209	-2.65825	-3.10866	-2.29209	4.33476	199.259	Test(B) set
-2.28055	-2.64099	-3.08323	-2.28055	4.28176	200.489	Test(B) set
-2.269	-2.62379	-3.05796	-2.269	4.22944	201.72	Test(B) set
-2.25745	-2.60665	-3.03285	-2.25745	4.17781	202.95	Test(B) set
-2.24591	-2.58956	-3.00791	-2.24591	4.12685	204.18	Test(B) set
-2.23436	-2.57253	-2.98312	-2.23436	4.07654	205.41	Test(B) set
-2.22281	-2.55555	-2.9585	-2.22281	4.02687	206.639	Test(B) set
-2.21126	-2.53863	-2.93403	-2.21126	3.97782	207.869	Test(B) set
-2.19972	-2.52176	-2.90972	-2.19972	3.9294	209.098	Test(B) set
-2.18817	-2.50494	-2.88556	-2.18817	3.88158	210.327	Test(B) set
-2.17662	-2.48818	-2.86154	-2.17662	3.83435	211.555	Test(B) set
-2.16508	-2.47146	-2.83768	-2.16508	3.78771	212.784	Test(B) set
-2.15353	-2.4548	-2.81397	-2.15353	3.74164	214.012	Test(B) set
-2.14198	-2.43819	-2.7904	-2.14198	3.69613	215.24	Test(B) set
-2.13043	-2.42163	-2.76697	-2.13043	3.65118	216.468	Test(B) set
-2.11889	-2.40512	-2.74368	-2.11889	3.60676	217.696	Test(B) set
-2.10734	-2.38866	-2.72054	-2.10734	3.56288	218.923	Test(B) set
-2.09579	-2.37225	-2.69753	-2.09579	3.51952	220.15	Test(B) set
-2.08425	-2.35589	-2.67466	-2.08425	3.47667	221.377	Test(B) set
-2.0727	-2.33958	-2.65192	-2.0727	3.43433	222.604	Test(B) set
-2.06115	-2.32331	-2.62932	-2.06115	3.39248	223.831	Test(B) set
-2.0496	-2.30709	-2.60685	-2.0496	3.35112	225.057	Test(B) set
-2.03806	-2.29092	-2.58451	-2.03806	3.31023	226.284	Test(B) set
-2.02651	-2.2748	-2.5623	-2.02651	3.26982	227.51	Test(B) set
-2.01496	-2.25872	-2.54021	-2.01496	3.22987	228.736	Test(B) set
-2.00342	-2.24269	-2.51825	-2.00342	3.19037	229.961	Test(B) set
-1.99187	-2.2267	-2.49642	-1.99187	3.15132	231.187	Test(B) set
-1.98032	-2.21076	-2.47471	-1.98032	3.1127	232.412	Test(B) set
-1.96878	-2.19486	-2.45312	-1.96878	3.07452	233.638	Test(B) set
-1.95723	-2.17901	-2.43165	-1.95723	3.03677	234.863	Test(B) set
-1.94568	-2.1632	-2.4103	-1.94568	2.99943	236.087	Test(B) set
-1.93413	-2.14743	-2.38907	-1.93413	2.9625	237.312	Test(B) set
-1.92259	-2.13171	-2.36795	-1.92259	2.92597	238.536	Test(B) set
-1.91104	-2.11603	-2.34695	-1.91104	2.88984	239.761	Test(B) set
-1.89949	-2.1004	-2.32606	-1.89949	2.8541	240.985	Test(B) set
-1.88795	-2.0848	-2.30529	-1.88795	2.81875	242.209	Test(B) set
-1.8764	-2.06925	-2.28462	-1.8764	2.78377	243.433	Test(B) set
-1.86485	-2.05374	-2.26407	-1.86485	2.74917	244.656	Test(B) set
-1.8533	-2.03827	-2.24362	-1.8533	2.71493	245.88	Test(B) set
-1.84176	-2.02284	-2.22329	-1.84176	2.68105	247.103	Test(B) set
-1.83021	-2.00745	-2.20306	-1.83021	2.64753	248.326	Test(B) set
-1.81866	-1.9921	-2.18293	-1.81866	2.61436	249.549	Test(B) set
-1.80712	-1.9768	-2.16292	-1.80712	2.58153	250.772	Test(B) set
-1.79557	-1.96153	-2.143	-1.79557	2.54904	251.995	Test(B) set
-1.78402	-1.9463	-2.12319	-1.78402	2.51688	253.217	Test(B) set
-1.77248	-1.93111	-2.10347	-1.77248	2.48505	254.439	Test(B) set
-1.76093	-1.91596	-2.08386	-1.76093	2.45354	255.662	Test(B) set
-1.74938	-1.90084	-2.06435	-1.74938	2.42236	256.884	Test(B) set
-1.73783	-1.88577	-2.04493	-1.73783	2.39148	258.106	Test(B) set

## Sheet: Nonlinear multivariate
x1	x2	x3	x4	x5	y	Dataset
-1.72629	-1.87073	-2.02562	-1.72629	2.36091	353.213	Training set
-1.71474	-1.85573	-2.0064	-1.71474	2.33065	354.778	Training set
-1.70319	-1.84077	-1.98727	-1.70319	2.30069	356.343	Training set
-1.69165	-1.82584	-1.96824	-1.69165	2.27102	357.908	Training set
-1.6801	-1.81096	-1.9493	-1.6801	2.24165	359.471	Training set
-1.66855	-1.7961	-1.93046	-1.66855	2.21256	361.034	Training set
-1.657	-1.78129	-1.91171	-1.657	2.18375	362.596	Training set
-1.64546	-1.76651	-1.89304	-1.64546	2.15522	364.157	Training set
-1.63391	-1.75176	-1.87447	-1.63391	2.12697	365.718	Training set
-1.62236	-1.73705	-1.85599	-1.62236	2.09898	367.278	Training set
-1.61082	-1.72238	-1.83759	-1.61082	2.07126	368.837	Training set
-1.59927	-1.70774	-1.81928	-1.59927	2.04381	370.396	Training set
-1.58772	-1.69314	-1.80106	-1.58772	2.01661	371.954	Training set
-1.57617	-1.67857	-1.78293	-1.57617	1.98967	373.511	Training set
-1.56463	-1.66403	-1.76488	-1.56463	1.96298	375.067	Training set
-1.55308	-1.64953	-1.74691	-1.55308	1.93654	376.623	Training set
-1.54153	-1.63506	-1.72903	-1.54153	1.91035	378.178	Training set
-1.52999	-1.62063	-1.71123	-1.52999	1.88439	379.732	Training set
-1.51844	-1.60622	-1.69351	-1.51844	1.85868	381.286	Training set
-1.50689	-1.59186	-1.67587	-1.50689	1.83319	382.839	Training set
-1.49535	-1.57752	-1.65832	-1.49535	1.80795	384.392	Training set
-1.4838	-1.56322	-1.64084	-1.4838	1.78292	385.943	Training set
-1.47225	-1.54895	-1.62344	-1.47225	1.75813	387.494	Training set
-1.4607	-1.53471	-1.60612	-1.4607	1.73355	389.045	Training set
-1.44916	-1.5205	-1.58888	-1.44916	1.7092	390.595	Training set
-1.43761	-1.50632	-1.57171	-1.43761	1.68506	392.144	Training set
-1.42606	-1.49218	-1.55462	-1.42606	1.66114	393.692	Training set
-1.41452	-1.47807	-1.53761	-1.41452	1.63743	395.24	Training set
-1.40297	-1.46399	-1.52067	-1.40297	1.61392	396.787	Training set
-1.39142	-1.44994	-1.5038	-1.39142	1.59062	398.334	Training set
-1.37987	-1.43592	-1.48701	-1.37987	1.56752	399.88	Training set
-1.36833	-1.42193	-1.47029	-1.36833	1.54463	401.425	Training set
-1.35678	-1.40797	-1.45364	-1.35678	1.52193	402.97	Training set
-1.34523	-1.39404	-1.43707	-1.34523	1.49942	404.514	Training set
-1.33369	-1.38014	-1.42057	-1.33369	1.47711	406.058	Training set
-1.32214	-1.36627	-1.40413	-1.32214	1.45499	407.601	Training set
-1.31059	-1.35243	-1.38777	-1.31059	1.43305	409.143	Training set
-1.29905	-1.33862	-1.37147	-1.29905	1.4113	410.685	Training set
-1.2875	-1.32484	-1.35525	-1.2875	1.38973	412.226	Training set
-1.27595	-1.31108	-1.33909	-1.27595	1.36835	413.767	Training set
-1.2644	-1.29736	-1.323	-1.2644	1.34714	415.307	Training set
-1.25286	-1.28366	-1.30697	-1.25286	1.3261	416.846	Training set
-1.24131	-1.27	-1.29102	-1.24131	1.30525	418.385	Training set
-1.22976	-1.25636	-1.27512	-1.22976	1.28456	419.923	Training set
-1.21822	-1.24275	-1.2593	-1.21822	1.26404	421.46	Training set
-1.20667	-1.22916	-1.24354	-1.20667	1.24369	422.998	Training set
-1.19512	-1.21561	-1.22784	-1.19512	1.22351	424.534	Training set
-1.18357	-1.20208	-1.2122	-1.18357	1.20348	426.07	Training set
-1.17203	-1.18858	-1.19663	-1.17203	1.18363	427.605	Training set
-1.16048	-1.17511	-1.18113	-1.16048	1.16392	429.14	Training set
-1.14893	-1.16166	-1.16568	-1.14893	1.14438	430.674	Training set
-1.13739	-1.14824	-1.15029	-1.13739	1.125	432.208	Training set
-1.12584	-1.13485	-1.13497	-1.12584	1.10576	433.741	Training set
-1.11429	-1.12148	-1.11971	-1.11429	1.08668	435.274	Training set
-1.10275	-1.10814	-1.10451	-1.10275	1.06775	436.806	Training set
-1.0912	-1.09483	-1.08936	-1.0912	1.04897	438.337	Training set
-1.07965	-1.08154	-1.07428	-1.07965	1.03033	439.868	Training set
-1.0681	-1.06828	-1.05926	-1.0681	1.01184	441.398	Training set
-1.05656	-1.05504	-1.04429	-1.05656	0.993494	442.928	Training set
-1.04501	-1.04183	-1.02938	-1.04501	0.975289	444.458	Training set
-1.03346	-1.02865	-1.01453	-1.03346	0.957223	445.986	Training set
-1.02192	-1.01549	-0.999739	-1.02192	0.939296	447.515	Training set
-1.01037	-1.00236	-0.985002	-1.01037	0.921506	449.042	Training set
-0.998822	-0.989247	-0.970321	-0.998822	0.903851	450.57	Training set
-0.987274	-0.976163	-0.955696	-0.987274	0.88633	452.096	Training set
-0.975727	-0.963104	-0.941126	-0.975727	0.868941	453.623	Training set
-0.96418	-0.950069	-0.926611	-0.96418	0.851683	455.148	Training set
-0.952633	-0.937059	-0.91215	-0.952633	0.834554	456.673	Training set
-0.941086	-0.924073	-0.897744	-0.941086	0.817552	458.198	Training set
-0.929539	-0.911111	-0.883391	-0.929539	0.800678	459.722	Training set
-0.917992	-0.898173	-0.869091	-0.917992	0.783928	461.246	Training set
-0.906445	-0.885259	-0.854844	-0.906445	0.767302	462.769	Training set
-0.894898	-0.872369	-0.84065	-0.894898	0.750798	464.292	Training set
-0.883351	-0.859503	-0.826508	-0.883351	0.734415	465.814	Training set
-0.871804	-0.84666	-0.812417	-0.871804	0.718152	467.336	Training set
-0.860257	-0.833841	-0.798378	-0.860257	0.702007	468.857	Training set
-0.84871	-0.821045	-0.78439	-0.84871	0.685979	470.377	Training set
-0.837163	-0.808272	-0.770452	-0.837163	0.670066	471.898	Training set
-0.825615	-0.795522	-0.756565	-0.825615	0.654268	473.417	Training set
-0.814068	-0.782795	-0.742727	-0.814068	0.638584	474.936	Training set
-0.802521	-0.770091	-0.728939	-0.802521	0.623011	476.455	Training set
-0.790974	-0.757409	-0.715201	-0.790974	0.607549	477.974	Training set
-0.779427	-0.74475	-0.701511	-0.779427	0.592197	479.491	Training set
-0.76788	-0.732114	-0.687869	-0.76788	0.576953	481.009	Training set
-0.756333	-0.7195	-0.674276	-0.756333	0.561817	482.525	Training set
-0.744786	-0.706908	-0.66073	-0.744786	0.546787	484.042	Training set
-0.733239	-0.694338	-0.647232	-0.733239	0.531862	485.558	Training set
-0.721692	-0.68179	-0.63378	-0.721692	0.517041	487.073	Training set
-0.710145	-0.669263	-0.620376	-0.710145	0.502323	488.588	Training set
-0.698598	-0.656759	-0.607018	-0.698598	0.487707	490.103	Training set
-0.687051	-0.644276	-0.593707	-0.687051	0.473192	491.617	Training set
-0.675504	-0.631815	-0.580441	-0.675504	0.458776	493.13	Training set
-0.663956	-0.619375	-0.56722	-0.663956	0.444459	494.644	Training set
-0.652409	-0.606956	-0.554045	-0.652409	0.43024	496.156	Training set
-0.640862	-0.594559	-0.540915	-0.640862	0.416118	497.669	Training set
-0.629315	-0.582182	-0.527829	-0.629315	0.402091	499.18	Training set
-0.617768	-0.569827	-0.514788	-0.617768	0.388159	500.692	Training set
-0.606221	-0.557492	-0.50179	-0.606221	0.374321	502.203	Training set
-0.594674	-0.545179	-0.488836	-0.594674	0.360576	503.713	Training set
-0.583127	-0.532885	-0.475926	-0.583127	0.346923	505.223	Training set
-0.57158	-0.520613	-0.463059	-0.57158	0.33336	506.733	Training set
-0.560033	-0.50836	-0.450234	-0.560033	0.319888	508.242	Training set
-0.548486	-0.496129	-0.437452	-0.548486	0.306505	509.751	Training set
-0.536939	-0.483917	-0.424713	-0.536939	0.293211	511.259	Training set
-0.525392	-0.471725	-0.412015	-0.525392	0.280004	512.767	Training set
-0.513845	-0.459554	-0.399359	-0.513845	0.266883	514.275	Training set
-0.502298	-0.447402	-0.386744	-0.502298	0.253848	515.782	Training set
-0.49075	-0.435271	-0.374171	-0.49075	0.240899	517.288	Training set
-0.479203	-0.423159	-0.361638	-0.479203	0.228033	518.794	Training set
-0.467656	-0.411066	-0.349147	-0.467656	0.21525	520.3	Training set
-0.456109	-0.398994	-0.336695	-0.456109	0.20255	521.806	Training set
-0.444562	-0.38694	-0.324284	-0.444562	0.189932	523.31	Training set
-0.433015	-0.374906	-0.311912	-0.433015	0.177395	524.815	Training set
-0.421468	-0.362892	-0.29958	-0.421468	0.164937	526.319	Training set
-0.409921	-0.350896	-0.287287	-0.409921	0.152559	527.823	Training set
-0.398374	-0.33892	-0.275034	-0.398374	0.14026	529.326	Training set
-0.386827	-0.326962	-0.262819	-0.386827	0.128038	530.829	Training set
-0.37528	-0.315024	-0.250643	-0.37528	0.115894	532.331	Training set
-0.363733	-0.303104	-0.238505	-0.363733	0.103826	533.834	Training set
-0.352186	-0.291203	-0.226406	-0.352186	0.0918336	535.335	Training set
-0.340639	-0.279321	-0.214344	-0.340639	0.0799161	536.837	Training set
-0.329091	-0.267457	-0.20232	-0.329091	0.0680729	538.337	Training set
-0.317544	-0.255612	-0.190333	-0.317544	0.0563033	539.838	Training set
-0.305997	-0.243785	-0.178383	-0.305997	0.0446065	541.338	Training set
-0.29445	-0.231976	-0.166471	-0.29445	0.032982	542.838	Training set
-0.282903	-0.220186	-0.154595	-0.282903	0.021429	544.337	Training set
-0.271356	-0.208413	-0.142755	-0.271356	0.00994684	545.836	Training set
-0.259809	-0.196659	-0.130952	-0.259809	-0.00146507	547.334	Training set
-0.248262	-0.184923	-0.119185	-0.248262	-0.0128074	548.832	Training set
-0.236715	-0.173204	-0.107453	-0.236715	-0.0240808	550.33	Training set
-0.225168	-0.161504	-0.0957576	-0.225168	-0.0352858	551.828	Training set
-0.213621	-0.149821	-0.0840973	-0.213621	-0.0464232	553.325	Training set
-0.202074	-0.138155	-0.0724721	-0.202074	-0.0574934	554.821	Training set
-0.190527	-0.126508	-0.0608819	-0.190527	-0.0684972	556.317	Training set
-0.17898	-0.114877	-0.0493264	-0.17898	-0.0794351	557.813	Training set
-0.167433	-0.103265	-0.0378055	-0.167433	-0.0903076	559.309	Training set
-0.155885	-0.0916691	-0.0263189	-0.155885	-0.101116	560.804	Training set
-0.144338	-0.0800908	-0.0148665	-0.144338	-0.111859	562.298	Training set
-0.132791	-0.0685297	-0.00344797	-0.132791	-0.122539	563.793	Training set
-0.121244	-0.0569856	0.00793681	-0.121244	-0.133156	565.287	Training set
-0.109697	-0.0454586	0.019288	-0.109697	-0.143711	566.78	Training set
-0.0981501	-0.0339485	0.030606	-0.0981501	-0.154204	568.274	Training set
-0.086603	-0.0224553	0.0418907	-0.086603	-0.164635	569.766	Training set
-0.075056	-0.0109788	0.0531425	-0.075056	-0.175006	571.259	Training set
-0.0635089	0.000480869	0.0643616	-0.0635089	-0.185316	572.751	Training set
-0.0519618	0.0119239	0.0755481	-0.0519618	-0.195567	574.243	Training set
-0.0404147	0.0233504	0.0867022	-0.0404147	-0.205758	575.734	Training set
-0.0288677	0.0347604	0.0978241	-0.0288677	-0.215891	577.225	Training set
-0.0173206	0.046154	0.108914	-0.0173206	-0.225965	578.716	Training set
-0.00577353	0.0575312	0.119972	-0.00577353	-0.235981	580.206	Training set
0.00577353	0.0688921	0.130999	0.00577353	-0.245941	581.696	Training set
0.0173206	0.0802368	0.141994	0.0173206	-0.255843	583.186	Training set
0.0288677	0.0915654	0.152957	0.0288677	-0.26569	584.675	Training set
0.0404147	0.102878	0.16389	0.0404147	-0.27548	586.164	Training set
0.0519618	0.114174	0.174792	0.0519618	-0.285215	587.653	Training set
0.0635089	0.125455	0.185663	0.0635089	-0.294896	589.141	Training set
0.075056	0.13672	0.196503	0.075056	-0.304522	590.629	Training set
0.086603	0.147968	0.207313	0.086603	-0.314094	592.117	Training set
0.0981501	0.159201	0.218093	0.0981501	-0.323612	593.604	Training set
0.109697	0.170419	0.228842	0.109697	-0.333078	595.091	Training set
0.121244	0.181621	0.239562	0.121244	-0.342491	596.577	Training set
0.132791	0.192807	0.250252	0.132791	-0.351852	598.063	Training set
0.144338	0.203978	0.260912	0.144338	-0.361161	599.549	Training set
0.155885	0.215133	0.271543	0.155885	-0.370419	601.035	Training set
0.167433	0.226273	0.282145	0.167433	-0.379626	602.52	Training set
0.17898	0.237398	0.292718	0.17898	-0.388782	604.005	Training set
0.190527	0.248507	0.303262	0.190527	-0.397889	605.489	Training set
0.202074	0.259601	0.313777	0.202074	-0.406945	606.973	Training set
0.213621	0.270681	0.324263	0.213621	-0.415953	608.457	Training set
0.225168	0.281745	0.334721	0.225168	-0.424912	609.941	Training set
0.236715	0.292794	0.345151	0.236715	-0.433822	611.424	Training set
0.248262	0.303828	0.355552	0.248262	-0.442685	612.907	Training set
0.259809	0.314848	0.365926	0.259809	-0.451499	614.389	Training set
0.271356	0.325852	0.376271	0.271356	-0.460267	615.871	Training set
0.282903	0.336842	0.386589	0.282903	-0.468987	617.353	Training set
0.29445	0.347817	0.396879	0.29445	-0.477661	618.835	Training set
0.305997	0.358778	0.407142	0.305997	-0.486289	620.316	Training set
0.317544	0.369724	0.417378	0.317544	-0.494871	621.797	Training set
0.329091	0.380655	0.427587	0.329091	-0.503408	623.277	Training set
0.340639	0.391572	0.437768	0.340639	-0.5119	624.758	Training set
0.352186	0.402475	0.447923	0.352186	-0.520347	626.238	Training set
0.363733	0.413363	0.458051	0.363733	-0.528749	627.717	Training set
0.37528	0.424237	0.468153	0.37528	-0.537108	629.197	Training set
0.386827	0.435097	0.478228	0.386827	-0.545423	630.676	Training set
0.398374	0.445943	0.488277	0.398374	-0.553695	632.154	Training set
0.409921	0.456774	0.4983	0.409921	-0.561923	633.633	Training set
0.421468	0.467592	0.508296	0.421468	-0.570109	635.111	Training set
0.433015	0.478395	0.518267	0.433015	-0.578253	636.588	Training set
0.444562	0.489185	0.528212	0.444562	-0.586355	638.066	Training set
0.456109	0.49996	0.538132	0.456109	-0.594415	639.543	Training set
0.467656	0.510722	0.548026	0.467656	-0.602434	641.02	Training set
0.479203	0.52147	0.557895	0.479203	-0.610412	642.496	Training set
0.49075	0.532204	0.567738	0.49075	-0.618349	643.973	Training set
0.502298	0.542925	0.577557	0.502298	-0.626245	645.448	Training set
0.513845	0.553632	0.58735	0.513845	-0.634102	646.924	Training set
0.525392	0.564325	0.597119	0.525392	-0.641919	648.399	Training set
0.536939	0.575005	0.606863	0.536939	-0.649696	649.874	Training set
0.548486	0.585671	0.616582	0.548486	-0.657434	651.349	Training set
0.560033	0.596324	0.626277	0.560033	-0.665134	652.823	Training set
0.57158	0.606964	0.635948	0.57158	-0.672794	654.298	Training set
0.583127	0.61759	0.645594	0.583127	-0.680417	655.771	Training set
0.594674	0.628203	0.655217	0.594674	-0.688001	657.245	Training set
0.606221	0.638803	0.664815	0.606221	-0.695548	658.718	Training set
0.617768	0.649389	0.67439	0.617768	-0.703057	660.191	Training set
0.629315	0.659962	0.68394	0.629315	-0.710529	661.664	Training set
0.640862	0.670523	0.693468	0.640862	-0.717964	663.136	Training set
0.652409	0.68107	0.702971	0.652409	-0.725362	664.608	Training set
0.663956	0.691604	0.712452	0.663956	-0.732725	666.08	Training set
0.675504	0.702126	0.721909	0.675504	-0.740051	667.551	Training set
0.687051	0.712634	0.731343	0.687051	-0.747341	669.023	Training set
0.698598	0.72313	0.740753	0.698598	-0.754596	670.493	Training set
0.710145	0.733613	0.750141	0.710145	-0.761815	671.964	Training set
0.721692	0.744083	0.759506	0.721692	-0.768999	673.434	Training set
0.733239	0.75454	0.768849	0.733239	-0.776149	674.905	Training set
0.744786	0.764985	0.778169	0.744786	-0.783264	676.374	Training set
0.756333	0.775417	0.787466	0.756333	-0.790344	677.844	Training set
0.76788	0.785837	0.796741	0.76788	-0.797391	679.313	Training set
0.779427	0.796244	0.805994	0.779427	-0.804404	680.782	Training set
0.790974	0.806639	0.815224	0.790974	-0.811383	682.251	Training set
0.802521	0.817021	0.824433	0.802521	-0.818329	683.719	Training set
0.814068	0.827391	0.833619	0.814068	-0.825242	685.187	Training set
0.825615	0.837748	0.842784	0.825615	-0.832122	686.655	Training set
0.837163	0.848093	0.851927	0.837163	-0.83897	688.122	Training set
0.84871	0.858426	0.861048	0.84871	-0.845785	689.59	Training set
0.860257	0.868747	0.870148	0.860257	-0.852568	691.057	Training set
0.871804	0.879056	0.879226	0.871804	-0.859319	692.523	Training set
0.883351	0.889352	0.888283	0.883351	-0.866038	693.99	Training set
0.894898	0.899637	0.897319	0.894898	-0.872726	695.456	Training set
0.906445	0.909909	0.906333	0.906445	-0.879382	696.922	Training set
0.917992	0.920169	0.915327	0.917992	-0.886008	698.388	Training set
0.929539	0.930418	0.9243	0.929539	-0.892603	699.853	Training set
0.941086	0.940654	0.933251	0.941086	-0.899167	701.318	Training set
0.952633	0.950879	0.942182	0.952633	-0.9057	702.783	Training set
0.96418	0.961091	0.951093	0.96418	-0.912204	704.247	Training set
0.975727	0.971292	0.959983	0.975727	-0.918678	705.712	Training set
0.987274	0.981482	0.968852	0.987274	-0.925122	707.176	Training set
0.998822	0.991659	0.977701	0.998822	-0.931536	708.64	Training set
1.01037	1.00183	0.98653	1.01037	-0.937921	710.103	Training set
1.02192	1.01198	0.995338	1.02192	-0.944276	711.566	Training set
1.03346	1.02212	1.00413	1.03346	-0.950603	713.029	Training set
1.04501	1.03225	1.0129	1.04501	-0.956901	714.492	Training set
1.05656	1.04237	1.02164	1.05656	-0.963171	715.954	Training set
1.0681	1.05248	1.03037	1.0681	-0.969412	717.417	Training set
1.07965	1.06258	1.03908	1.07965	-0.975625	718.879	Training set
1.0912	1.07266	1.04777	1.0912	-0.98181	720.34	Training set
1.10275	1.08274	1.05644	1.10275	-0.987967	721.802	Training set
1.11429	1.0928	1.06509	1.11429	-0.994097	723.263	Training set
1.12584	1.10285	1.07372	1.12584	-1.0002	724.724	Training set
1.13739	1.11289	1.08233	1.13739	-1.00627	726.185	Training set
1.14893	1.12292	1.09093	1.14893	-1.01232	727.645	Training set
1.16048	1.13294	1.0995	1.16048	-1.01834	729.105	Training set
1.17203	1.14294	1.10805	1.17203	-1.02434	730.565	Training set
1.18357	1.15294	1.11659	1.18357	-1.0303	732.025	Training set
1.19512	1.16292	1.12511	1.19512	-1.03625	733.484	Training set
1.20667	1.1729	1.1336	1.20667	-1.04216	734.943	Training set
1.21822	1.18286	1.14208	1.21822	-1.04805	736.402	Training set
1.22976	1.19281	1.15054	1.22976	-1.05391	737.861	Training set
1.24131	1.20275	1.15899	1.24131	-1.05975	739.319	Training set
1.25286	1.21268	1.16741	1.25286	-1.06556	740.778	Training set
1.2644	1.2226	1.17581	1.2644	-1.07135	742.235	Training set
1.27595	1.23251	1.1842	1.27595	-1.07711	743.693	Training set
1.2875	1.24241	1.19257	1.2875	-1.08285	745.151	Training set
1.29905	1.25229	1.20092	1.29905	-1.08856	746.608	Training set
1.31059	1.26217	1.20925	1.31059	-1.09425	748.065	Training set
1.32214	1.27204	1.21757	1.32214	-1.09991	749.521	Training set
1.33369	1.28189	1.22586	1.33369	-1.10555	750.978	Training set
1.34523	1.29173	1.23414	1.34523	-1.11116	752.434	Training set
1.35678	1.30157	1.2424	1.35678	-1.11675	753.89	Training set
1.36833	1.31139	1.25065	1.36833	-1.12232	755.346	Training set
1.37987	1.3212	1.25887	1.37987	-1.12786	756.801	Training set
1.39142	1.33101	1.26708	1.39142	-1.13338	758.257	Training set
1.40297	1.3408	1.27527	1.40297	-1.13888	759.712	Training set
1.41452	1.35058	1.28344	1.41452	-1.14435	761.166	Training set
1.42606	1.36035	1.2916	1.42606	-1.1498	762.621	Training set
1.43761	1.37011	1.29974	1.43761	-1.15522	764.075	Training set
1.44916	1.37986	1.30786	1.44916	-1.16063	765.529	Training set
1.4607	1.3896	1.31597	1.4607	-1.16601	766.983	Training set
1.47225	1.39933	1.32405	1.47225	-1.17137	768.437	Training set
1.4838	1.40905	1.33212	1.4838	-1.1767	769.89	Training set
1.49535	1.41876	1.34018	1.49535	-1.18201	771.343	Training set
1.50689	1.42846	1.34821	1.50689	-1.18731	772.796	Training set
1.51844	1.43815	1.35624	1.51844	-1.19257	774.249	Training set
1.52999	1.44783	1.36424	1.52999	-1.19782	775.702	Training set
1.54153	1.4575	1.37223	1.54153	-1.20305	777.154	Training set
1.55308	1.46716	1.3802	1.55308	-1.20825	778.606	Training set
1.56463	1.4768	1.38815	1.56463	-1.21343	780.058	Training set
1.57617	1.48644	1.39609	1.57617	-1.21859	781.509	Training set
1.58772	1.49607	1.40401	1.58772	-1.22373	782.96	Training set
1.59927	1.50569	1.41191	1.59927	-1.22885	784.412	Training set
1.61082	1.5153	1.4198	1.61082	-1.23395	785.862	Training set
1.62236	1.5249	1.42768	1.62236	-1.23903	787.313	Training set
1.63391	1.53449	1.43553	1.63391	-1.24409	788.764	Training set
1.64546	1.54407	1.44337	1.64546	-1.24912	790.214	Training set
1.657	1.55364	1.4512	1.657	-1.25414	791.664	Training set
1.66855	1.5632	1.45901	1.66855	-1.25913	793.113	Training set
1.6801	1.57275	1.4668	1.6801	-1.26411	794.563	Training set
1.69165	1.5823	1.47458	1.69165	-1.26906	796.012	Training set
1.70319	1.59183	1.48234	1.70319	-1.274	797.461	Training set
1.71474	1.60135	1.49009	1.71474	-1.27891	798.91	Training set
1.72629	1.61086	1.49782	1.72629	-1.28381	800.359	Training set
1.73783	1.62037	1.50553	1.73783	-1.28868	801.807	Test(F) set
1.74938	1.62986	1.51323	1.74938	-1.29354	803.256	Test(F) set
1.76093	1.63934	1.52092	1.76093	-1.29838	804.704	Test(F) set
1.77248	1.64882	1.52859	1.77248	-1.30319	806.151	Test(F) set
1.78402	1.65828	1.53624	1.78402	-1.30799	807.599	Test(F) set
1.79557	1.66774	1.54388	1.79557	-1.31277	809.046	Test(F) set
1.80712	1.67719	1.5515	1.80712	-1.31753	810.493	Test(F) set
1.81866	1.68662	1.55911	1.81866	-1.32228	811.94	Test(F) set
1.83021	1.69605	1.5667	1.83021	-1.327	813.387	Test(F) set
1.84176	1.70547	1.57428	1.84176	-1.3317	814.833	Test(F) set
1.8533	1.71488	1.58185	1.8533	-1.33639	816.28	Test(F) set
1.86485	1.72428	1.5894	1.86485	-1.34106	817.726	Test(F) set
1.8764	1.73367	1.59693	1.8764	-1.34571	819.172	Test(F) set
1.88795	1.74305	1.60445	1.88795	-1.35034	820.617	Test(F) set
1.89949	1.75243	1.61195	1.89949	-1.35495	822.063	Test(F) set
1.91104	1.76179	1.61944	1.91104	-1.35955	823.508	Test(F) set
1.92259	1.77114	1.62692	1.92259	-1.36413	824.953	Test(F) set
1.93413	1.78049	1.63438	1.93413	-1.36869	826.398	Test(F) set
1.94568	1.78983	1.64183	1.94568	-1.37323	827.842	Test(F) set
1.95723	1.79915	1.64926	1.95723	-1.37775	829.287	Test(F) set
1.96878	1.80847	1.65668	1.96878	-1.38226	830.731	Test(F) set
1.98032	1.81778	1.66408	1.98032	-1.38675	832.175	Test(F) set
1.99187	1.82708	1.67147	1.99187	-1.39123	833.619	Test(F) set
2.00342	1.83637	1.67885	2.00342	-1.39568	835.062	Test(F) set
2.01496	1.84566	1.68621	2.01496	-1.40012	836.506	Test(F) set
2.02651	1.85493	1.69356	2.02651	-1.40454	837.949	Test(F) set
2.03806	1.8642	1.70089	2.03806	-1.40895	839.392	Test(F) set
2.0496	1.87345	1.70821	2.0496	-1.41334	840.834	Test(F) set
2.06115	1.8827	1.71552	2.06115	-1.41771	842.277	Test(F) set
2.0727	1.89194	1.72281	2.0727	-1.42206	843.719	Test(F) set
2.08425	1.90117	1.73009	2.08425	-1.4264	845.161	Test(F) set
2.09579	1.91039	1.73735	2.09579	-1.43073	846.603	Test(F) set
2.10734	1.9196	1.7446	2.10734	-1.43503	848.045	Test(F) set
2.11889	1.92881	1.75184	2.11889	-1.43932	849.487	Test(F) set
2.13043	1.938	1.75906	2.13043	-1.4436	850.928	Test(F) set
2.14198	1.94719	1.76627	2.14198	-1.44786	852.369	Test(F) set
2.15353	1.95637	1.77347	2.15353	-1.4521	853.81	Test(F) set
2.16508	1.96554	1.78065	2.16508	-1.45632	855.251	Test(F) set
2.17662	1.9747	1.78782	2.17662	-1.46054	856.691	Test(F) set
2.18817	1.98385	1.79498	2.18817	-1.46473	858.131	Test(F) set
2.19972	1.99299	1.80212	2.19972	-1.46891	859.572	Test(F) set
2.21126	2.00213	1.80925	2.21126	-1.47307	861.012	Test(F) set
2.22281	2.01126	1.81637	2.22281	-1.47722	862.451	Test(F) set
2.23436	2.02038	1.82347	2.23436	-1.48136	863.891	Test(F) set
2.24591	2.02949	1.83056	2.24591	-1.48547	865.33	Test(F) set
2.25745	2.03859	1.83764	2.25745	-1.48958	866.769	Test(F) set
2.269	2.04768	1.8447	2.269	-1.49367	868.208	Test(F) set
2.28055	2.05677	1.85176	2.28055	-1.49774	869.647	Test(F) set
2.29209	2.06584	1.85879	2.29209	-1.5018	871.086	Test(F) set
2.30364	2.07491	1.86582	2.30364	-1.50584	872.524	Test(F) set
2.31519	2.08397	1.87283	2.31519	-1.50987	873.962	Test(F) set
2.32673	2.09303	1.87983	2.32673	-1.51388	875.4	Test(F) set
2.33828	2.10207	1.88682	2.33828	-1.51788	876.838	Test(F) set
2.34983	2.11111	1.8938	2.34983	-1.52187	878.276	Test(F) set
2.36138	2.12013	1.90076	2.36138	-1.52584	879.713	Test(F) set
2.37292	2.12915	1.90771	2.37292	-1.5298	881.15	Test(F) set
2.38447	2.13817	1.91465	2.38447	-1.53374	882.587	Test(F) set
2.39602	2.14717	1.92157	2.39602	-1.53767	884.024	Test(F) set
2.40756	2.15616	1.92848	2.40756	-1.54158	885.461	Test(F) set
2.41911	2.16515	1.93538	2.41911	-1.54548	886.897	Test(F) set
2.43066	2.17413	1.94227	2.43066	-1.54937	888.334	Test(F) set
2.44221	2.1831	1.94915	2.44221	-1.55324	889.77	Test(F) set
2.45375	2.19206	1.95601	2.45375	-1.5571	891.206	Test(F) set
2.4653	2.20102	1.96286	2.4653	-1.56094	892.641	Test(F) set
2.47685	2.20997	1.9697	2.47685	-1.56478	894.077	Test(F) set
2.48839	2.21891	1.97653	2.48839	-1.56859	895.512	Test(F) set
2.49994	2.22784	1.98334	2.49994	-1.5724	896.947	Test(F) set
2.51149	2.23676	1.99015	2.51149	-1.57619	898.382	Test(F) set
2.52303	2.24568	1.99694	2.52303	-1.57997	899.817	Test(F) set
2.53458	2.25458	2.00371	2.53458	-1.58373	901.252	Test(F) set
2.54613	2.26348	2.01048	2.54613	-1.58748	902.686	Test(F) set
2.55768	2.27238	2.01724	2.55768	-1.59122	904.121	Test(F) set
2.56922	2.28126	2.02398	2.56922	-1.59494	905.555	Test(F) set
2.58077	2.29014	2.03071	2.58077	-1.59865	906.989	Test(F) set
2.59232	2.29901	2.03743	2.59232	-1.60235	908.422	Test(F) set
2.60386	2.30787	2.04414	2.60386	-1.60604	909.856	Test(F) set
2.61541	2.31672	2.05084	2.61541	-1.60971	911.289	Test(F) set
2.62696	2.32557	2.05752	2.62696	-1.61337	912.722	Test(F) set
2.63851	2.33441	2.06419	2.63851	-1.61702	914.155	Test(F) set
2.65005	2.34324	2.07085	2.65005	-1.62066	915.588	Test(F) set
2.6616	2.35206	2.07751	2.6616	-1.62428	917.021	Test(F) set
2.67315	2.36087	2.08414	2.67315	-1.62789	918.453	Test(F) set
2.68469	2.36968	2.09077	2.68469	-1.63149	919.885	Test(F) set
2.69624	2.37848	2.09739	2.69624	-1.63507	921.318	Test(F) set
2.70779	2.38727	2.10399	2.70779	-1.63864	922.749	Test(F) set
2.71933	2.39606	2.11058	2.71933	-1.64221	924.181	Test(F) set
2.73088	2.40484	2.11717	2.73088	-1.64575	925.613	Test(F) set
2.74243	2.41361	2.12374	2.74243	-1.64929	927.044	Test(F) set
2.75398	2.42237	2.1303	2.75398	-1.65282	928.475	Test(F) set
2.76552	2.43113	2.13685	2.76552	-1.65633	929.906	Test(F) set
2.77707	2.43987	2.14338	2.77707	-1.65983	931.337	Test(F) set
2.78862	2.44861	2.14991	2.78862	-1.66332	932.768	Test(F) set
2.80016	2.45735	2.15642	2.80016	-1.66679	934.198	Test(F) set
2.81171	2.46607	2.16293	2.81171	-1.67026	935.629	Test(F) set
2.82326	2.47479	2.16942	2.82326	-1.67371	937.059	Test(F) set
2.83481	2.4835	2.1759	2.83481	-1.67716	938.489	Test(F) set
2.84635	2.4922	2.18238	2.84635	-1.68059	939.919	Test(F) set
2.8579	2.5009	2.18884	2.8579	-1.68401	941.348	Test(F) set
2.86945	2.50959	2.19529	2.86945	-1.68741	942.778	Test(F) set
2.88099	2.51827	2.20172	2.88099	-1.69081	944.207	Test(F) set
2.89254	2.52695	2.20815	2.89254	-1.69419	945.636	Test(F) set
2.90409	2.53561	2.21457	2.90409	-1.69757	947.065	Test(F) set
2.91564	2.54427	2.22098	2.91564	-1.70093	948.494	Test(F) set
2.92718	2.55293	2.22737	2.92718	-1.70428	949.923	Test(F) set
2.93873	2.56157	2.23376	2.93873	-1.70762	951.351	Test(F) set
2.95028	2.57021	2.24013	2.95028	-1.71095	952.779	Test(F) set
2.96182	2.57884	2.2465	2.96182	-1.71427	954.208	Test(F) set
2.97337	2.58747	2.25285	2.97337	-1.71758	955.636	Test(F) set
2.98492	2.59608	2.2592	2.98492	-1.72087	957.063	Test(F) set
2.99646	2.60469	2.26553	2.99646	-1.72416	958.491	Test(F) set
3.00801	2.6133	2.27185	3.00801	-1.72743	959.918	Test(F) set
3.01956	2.62189	2.27817	3.01956	-1.7307	961.346	Test(F) set
3.03111	2.63048	2.28447	3.03111	-1.73395	962.773	Test(F) set
3.04265	2.63906	2.29076	3.04265	-1.73719	964.2	Test(F) set
3.0542	2.64764	2.29704	3.0542	-1.74042	965.627	Test(F) set
3.06575	2.65621	2.30331	3.06575	-1.74365	967.053	Test(F) set
3.07729	2.66477	2.30957	3.07729	-1.74686	968.48	Test(F) set
3.08884	2.67332	2.31582	3.08884	-1.75006	969.906	Test(F) set
3.10039	2.68187	2.32207	3.10039	-1.75325	971.332	Test(F) set
3.11194	2.69041	2.3283	3.11194	-1.75643	972.758	Test(F) set
3.12348	2.69894	2.33452	3.12348	-1.7596	974.184	Test(F) set
3.13503	2.70747	2.34073	3.13503	-1.76276	975.609	Test(F) set
3.14658	2.71599	2.34693	3.14658	-1.76591	977.035	Test(F) set
3.15812	2.7245	2.35312	3.15812	-1.76905	978.46	Test(F) set
3.16967	2.73301	2.3593	3.16967	-1.77218	979.885	Test(F) set
3.18122	2.7415	2.36547	3.18122	-1.7753	981.31	Test(F) set
3.19276	2.75	2.37163	3.19276	-1.77841	982.735	Test(F) set
3.20431	2.75848	2.37778	3.20431	-1.7815	984.16	Test(F) set
3.21586	2.76696	2.38392	3.21586	-1.78459	985.584	Test(F) set
3.22741	2.77543	2.39006	3.22741	-1.78767	987.009	Test(F) set
3.23895	2.7839	2.39618	3.23895	-1.79074	988.433	Test(F) set
3.2505	2.79236	2.40229	3.2505	-1.7938	989.857	Test(F) set
3.26205	2.80081	2.40839	3.26205	-1.79685	991.281	Test(F) set
3.27359	2.80925	2.41449	3.27359	-1.7999	992.704	Test(F) set
3.28514	2.81769	2.42057	3.28514	-1.80293	994.128	Test(F) set
3.29669	2.82612	2.42664	3.29669	-1.80595	995.551	Test(F) set
3.30824	2.83455	2.43271	3.30824	-1.80896	996.975	Test(F) set
3.31978	2.84297	2.43876	3.31978	-1.81196	998.398	Test(F) set
3.33133	2.85138	2.44481	3.33133	-1.81496	999.821	Test(F) set
3.34288	2.85979	2.45084	3.34288	-1.81794	1001.24	Test(F) set
3.35442	2.86818	2.45687	3.35442	-1.82092	1002.67	Test(F) set
3.36597	2.87658	2.46288	3.36597	-1.82388	1004.09	Test(F) set
3.37752	2.88496	2.46889	3.37752	-1.82684	1005.51	Test(F) set
3.38906	2.89334	2.47489	3.38906	-1.82978	1006.93	Test(F) set
3.40061	2.90171	2.48088	3.40061	-1.83272	1008.35	Test(F) set
3.41216	2.91008	2.48686	3.41216	-1.83565	1009.78	Test(F) set
3.42371	2.91844	2.49283	3.42371	-1.83857	1011.2	Test(F) set
3.43525	2.92679	2.49879	3.43525	-1.84148	1012.62	Test(F) set
3.4468	2.93514	2.50474	3.4468	-1.84438	1014.04	Test(F) set
3.45835	2.94348	2.51068	3.45835	-1.84728	1015.46	Test(F) set
3.46989	2.95181	2.51662	3.46989	-1.85016	1016.88	Test(F) set
3.48144	2.96014	2.52254	3.48144	-1.85303	1018.3	Test(F) set
3.49299	2.96846	2.52846	3.49299	-1.8559	1019.73	Test(F) set
3.50454	2.97678	2.53436	3.50454	-1.85876	1021.15	Test(F) set
3.51608	2.98509	2.54026	3.51608	-1.86161	1022.57	Test(F) set
3.52763	2.99339	2.54615	3.52763	-1.86445	1023.99	Test(F) set
3.53918	3.00168	2.55203	3.53918	-1.86728	1025.41	Test(F) set
3.55072	3.00997	2.5579	3.55072	-1.8701	1026.83	Test(F) set
3.56227	3.01826	2.56376	3.56227	-1.87291	1028.25	Test(F) set
3.57382	3.02653	2.56961	3.57382	-1.87572	1029.67	Test(F) set
3.58537	3.0348	2.57545	3.58537	-1.87852	1031.09	Test(F) set
3.59691	3.04307	2.58129	3.59691	-1.88131	1032.5	Test(F) set
3.60846	3.05132	2.58711	3.60846	-1.88409	1033.92	Test(F) set
3.62001	3.05958	2.59293	3.62001	-1.88686	1035.34	Test(F) set
3.63155	3.06782	2.59874	3.63155	-1.88962	1036.76	Test(F) set
3.6431	3.07606	2.60454	3.6431	-1.89238	1038.18	Test(F) set
3.65465	3.08429	2.61033	3.65465	-1.89512	1039.6	Test(F) set
3.66619	3.09252	2.61611	3.66619	-1.89786	1041.02	Test(F) set
3.67774	3.10074	2.62189	3.67774	-1.90059	1042.44	Test(F) set
3.68929	3.10896	2.62765	3.68929	-1.90331	1043.85	Test(F) set
3.70084	3.11716	2.63341	3.70084	-1.90603	1045.27	Test(F) set
3.71238	3.12537	2.63915	3.71238	-1.90873	1046.69	Test(F) set
3.72393	3.13356	2.64489	3.72393	-1.91143	1048.11	Test(F) set
3.73548	3.14175	2.65062	3.73548	-1.91412	1049.53	Test(F) set
3.74702	3.14994	2.65635	3.74702	-1.9168	1050.94	Test(F) set
3.75857	3.15812	2.66206	3.75857	-1.91948	1052.36	Test(F) set
3.77012	3.16629	2.66776	3.77012	-1.92214	1053.78	Test(F) set
3.78167	3.17445	2.67346	3.78167	-1.9248	1055.2	Test(F) set
3.79321	3.18261	2.67915	3.79321	-1.92745	1056.61	Test(F) set
3.80476	3.19077	2.68483	3.80476	-1.93009	1058.03	Test(F) set
3.81631	3.19892	2.6905	3.81631	-1.93273	1059.45	Test(F) set
3.82785	3.20706	2.69616	3.82785	-1.93536	1060.86	Test(F) set
3.8394	3.21519	2.70182	3.8394	-1.93798	1062.28	Test(F) set
3.85095	3.22332	2.70746	3.85095	-1.94059	1063.69	Test(F) set
3.86249	3.23145	2.7131	3.86249	-1.94319	1065.11	Test(F) set
3.87404	3.23956	2.71873	3.87404	-1.94579	1066.53	Test(F) set
3.88559	3.24768	2.72435	3.88559	-1.94838	1067.94	Test(F) set
3.89714	3.25578	2.72997	3.89714	-1.95096	1069.36	Test(F) set
3.90868	3.26388	2.73557	3.90868	-1.95353	1070.77	Test(F) set
3.92023	3.27198	2.74117	3.92023	-1.9561	1072.19	Test(F) set
3.93178	3.28007	2.74676	3.93178	-1.95866	1073.6	Test(F) set
3.94332	3.28815	2.75234	3.94332	-1.96121	1075.02	Test(F) set
3.95487	3.29623	2.75791	3.95487	-1.96375	1076.43	Test(F) set
3.96642	3.3043	2.76348	3.96642	-1.96629	1077.85	Test(F) set
3.97797	3.31236	2.76904	3.97797	-1.96882	1079.26	Test(F) set
3.98951	3.32042	2.77458	3.98951	-1.97134	1080.68	Test(F) set
4.00106	3.32847	2.78013	4.00106	-1.97386	1082.09	Test(F) set
4.01261	3.33652	2.78566	4.01261	-1.97636	1083.51	Test(F) set
4.02415	3.34456	2.79118	4.02415	-1.97886	1084.92	Test(F) set
4.0357	3.3526	2.7967	4.0357	-1.98136	1086.33	Test(F) set
-1.21822	-1.24275	-1.2593	-1.21822	1.26404	421.46	Test(I) set
-1.20667	-1.22916	-1.24354	-1.20667	1.24369	422.998	Test(I) set
-1.19512	-1.21561	-1.22784	-1.19512	1.22351	424.534	Test(I) set
-1.18357	-1.20208	-1.2122	-1.18357	1.20348	426.07	Test(I) set
-1.17203	-1.18858	-1.19663	-1.17203	1.18363	427.605	Test(I) set
-1.16048	-1.17511	-1.18113	-1.16048	1.16392	429.14	Test(I) set
-1.14893	-1.16166	-1.16568	-1.14893	1.14438	430.674	Test(I) set
-1.13739	-1.14824	-1.15029	-1.13739	1.125	432.208	Test(I) set
-1.12584	-1.13485	-1.13497	-1.12584	1.10576	433.741	Test(I) set
-1.11429	-1.12148	-1.11971	-1.11429	1.08668	435.274	Test(I) set
-1.10275	-1.10814	-1.10451	-1.10275	1.06775	436.806	Test(I) set
-1.0912	-1.09483	-1.08936	-1.0912	1.04897	438.337	Test(I) set
-1.07965	-1.08154	-1.07428	-1.07965	1.03033	439.868	Test(I) set
-1.0681	-1.06828	-1.05926	-1.0681	1.01184	441.398	Test(I) set
-1.05656	-1.05504	-1.04429	-1.05656	0.993494	442.928	Test(I) set
-1.04501	-1.04183	-1.02938	-1.04501	0.975289	444.458	Test(I) set
-1.03346	-1.02865	-1.01453	-1.03346	0.957223	445.986	Test(I) set
-1.02192	-1.01549	-0.999739	-1.02192	0.939296	447.515	Test(I) set
-1.01037	-1.00236	-0.985002	-1.01037	0.921506	449.042	Test(I) set
-0.998822	-0.989247	-0.970321	-0.998822	0.903851	450.57	Test(I) set
-0.987274	-0.976163	-0.955696	-0.987274	0.88633	452.096	Test(I) set
-0.975727	-0.963104	-0.941126	-0.975727	0.868941	453.623	Test(I) set
-0.96418	-0.950069	-0.926611	-0.96418	0.851683	455.148	Test(I) set
-0.952633	-0.937059	-0.91215	-0.952633	0.834554	456.673	Test(I) set
-0.941086	-0.924073	-0.897744	-0.941086	0.817552	458.198	Test(I) set
-0.929539	-0.911111	-0.883391	-0.929539	0.800678	459.722	Test(I) set
-0.917992	-0.898173	-0.869091	-0.917992	0.783928	461.246	Test(I) set
-0.906445	-0.885259	-0.854844	-0.906445	0.767302	462.769	Test(I) set
-0.894898	-0.872369	-0.84065	-0.894898	0.750798	464.292	Test(I) set
-0.883351	-0.859503	-0.826508	-0.883351	0.734415	465.814	Test(I) set
-0.871804	-0.84666	-0.812417	-0.871804	0.718152	467.336	Test(I) set
-0.860257	-0.833841	-0.798378	-0.860257	0.702007	468.857	Test(I) set
-0.84871	-0.821045	-0.78439	-0.84871	0.685979	470.377	Test(I) set
-0.837163	-0.808272	-0.770452	-0.837163	0.670066	471.898	Test(I) set
-0.825615	-0.795522	-0.756565	-0.825615	0.654268	473.417	Test(I) set
-0.814068	-0.782795	-0.742727	-0.814068	0.638584	474.936	Test(I) set
-0.802521	-0.770091	-0.728939	-0.802521	0.623011	476.455	Test(I) set
-0.790974	-0.757409	-0.715201	-0.790974	0.607549	477.974	Test(I) set
-0.779427	-0.74475	-0.701511	-0.779427	0.592197	479.491	Test(I) set
-0.76788	-0.732114	-0.687869	-0.76788	0.576953	481.009	Test(I) set
-0.756333	-0.7195	-0.674276	-0.756333	0.561817	482.525	Test(I) set
-0.744786	-0.706908	-0.66073	-0.744786	0.546787	484.042	Test(I) set
-0.733239	-0.694338	-0.647232	-0.733239	0.531862	485.558	Test(I) set
-0.721692	-0.68179	-0.63378	-0.721692	0.517041	487.073	Test(I) set
-0.710145	-0.669263	-0.620376	-0.710145	0.502323	488.588	Test(I) set
-0.698598	-0.656759	-0.607018	-0.698598	0.487707	490.103	Test(I) set
-0.687051	-0.644276	-0.593707	-0.687051	0.473192	491.617	Test(I) set
-0.675504	-0.631815	-0.580441	-0.675504	0.458776	493.13	Test(I) set
-0.663956	-0.619375	-0.56722	-0.663956	0.444459	494.644	Test(I) set
-0.652409	-0.606956	-0.554045	-0.652409	0.43024	496.156	Test(I) set
-0.640862	-0.594559	-0.540915	-0.640862	0.416118	497.669	Test(I) set
-0.629315	-0.582182	-0.527829	-0.629315	0.402091	499.18	Test(I) set
-0.617768	-0.569827	-0.514788	-0.617768	0.388159	500.692	Test(I) set
-0.606221	-0.557492	-0.50179	-0.606221	0.374321	502.203	Test(I) set
-0.594674	-0.545179	-0.488836	-0.594674	0.360576	503.713	Test(I) set
-0.583127	-0.532885	-0.475926	-0.583127	0.346923	505.223	Test(I) set
-0.57158	-0.520613	-0.463059	-0.57158	0.33336	506.733	Test(I) set
-0.560033	-0.50836	-0.450234	-0.560033	0.319888	508.242	Test(I) set
-0.548486	-0.496129	-0.437452	-0.548486	0.306505	509.751	Test(I) set
-0.536939	-0.483917	-0.424713	-0.536939	0.293211	511.259	Test(I) set
-0.525392	-0.471725	-0.412015	-0.525392	0.280004	512.767	Test(I) set
-0.513845	-0.459554	-0.399359	-0.513845	0.266883	514.275	Test(I) set
-0.502298	-0.447402	-0.386744	-0.502298	0.253848	515.782	Test(I) set
-0.49075	-0.435271	-0.374171	-0.49075	0.240899	517.288	Test(I) set
-0.479203	-0.423159	-0.361638	-0.479203	0.228033	518.794	Test(I) set
-0.467656	-0.411066	-0.349147	-0.467656	0.21525	520.3	Test(I) set
-0.456109	-0.398994	-0.336695	-0.456109	0.20255	521.806	Test(I) set
-0.444562	-0.38694	-0.324284	-0.444562	0.189932	523.31	Test(I) set
-0.433015	-0.374906	-0.311912	-0.433015	0.177395	524.815	Test(I) set
-0.421468	-0.362892	-0.29958	-0.421468	0.164937	526.319	Test(I) set
-0.409921	-0.350896	-0.287287	-0.409921	0.152559	527.823	Test(I) set
-0.398374	-0.33892	-0.275034	-0.398374	0.14026	529.326	Test(I) set
-0.386827	-0.326962	-0.262819	-0.386827	0.128038	530.829	Test(I) set
-0.37528	-0.315024	-0.250643	-0.37528	0.115894	532.331	Test(I) set
-0.363733	-0.303104	-0.238505	-0.363733	0.103826	533.834	Test(I) set
-0.352186	-0.291203	-0.226406	-0.352186	0.0918336	535.335	Test(I) set
-0.340639	-0.279321	-0.214344	-0.340639	0.0799161	536.837	Test(I) set
-0.329091	-0.267457	-0.20232	-0.329091	0.0680729	538.337	Test(I) set
-0.317544	-0.255612	-0.190333	-0.317544	0.0563033	539.838	Test(I) set
-0.305997	-0.243785	-0.178383	-0.305997	0.0446065	541.338	Test(I) set
-0.29445	-0.231976	-0.166471	-0.29445	0.032982	542.838	Test(I) set
-0.282903	-0.220186	-0.154595	-0.282903	0.021429	544.337	Test(I) set
-0.271356	-0.208413	-0.142755	-0.271356	0.00994684	545.836	Test(I) set
-0.259809	-0.196659	-0.130952	-0.259809	-0.00146507	547.334	Test(I) set
-0.248262	-0.184923	-0.119185	-0.248262	-0.0128074	548.832	Test(I) set
-0.236715	-0.173204	-0.107453	-0.236715	-0.0240808	550.33	Test(I) set
-0.225168	-0.161504	-0.0957576	-0.225168	-0.0352858	551.828	Test(I) set
-0.213621	-0.149821	-0.0840973	-0.213621	-0.0464232	553.325	Test(I) set
-0.202074	-0.138155	-0.0724721	-0.202074	-0.0574934	554.821	Test(I) set
-0.190527	-0.126508	-0.0608819	-0.190527	-0.0684972	556.317	Test(I) set
-0.17898	-0.114877	-0.0493264	-0.17898	-0.0794351	557.813	Test(I) set
-0.167433	-0.103265	-0.0378055	-0.167433	-0.0903076	559.309	Test(I) set
-0.155885	-0.0916691	-0.0263189	-0.155885	-0.101116	560.804	Test(I) set
-0.144338	-0.0800908	-0.0148665	-0.144338	-0.111859	562.298	Test(I) set
-0.132791	-0.0685297	-0.00344797	-0.132791	-0.122539	563.793	Test(I) set
-0.121244	-0.0569856	0.00793681	-0.121244	-0.133156	565.287	Test(I) set
-0.109697	-0.0454586	0.019288	-0.109697	-0.143711	566.78	Test(I) set
-0.0981501	-0.0339485	0.030606	-0.0981501	-0.154204	568.274	Test(I) set
-0.086603	-0.0224553	0.0418907	-0.086603	-0.164635	569.766	Test(I) set
-0.075056	-0.0109788	0.0531425	-0.075056	-0.175006	571.259	Test(I) set
-0.0635089	0.000480869	0.0643616	-0.0635089	-0.185316	572.751	Test(I) set
-0.0519618	0.0119239	0.0755481	-0.0519618	-0.195567	574.243	Test(I) set
-0.0404147	0.0233504	0.0867022	-0.0404147	-0.205758	575.734	Test(I) set
-0.0288677	0.0347604	0.0978241	-0.0288677	-0.215891	577.225	Test(I) set
-0.0173206	0.046154	0.108914	-0.0173206	-0.225965	578.716	Test(I) set
-0.00577353	0.0575312	0.119972	-0.00577353	-0.235981	580.206	Test(I) set
0.00577353	0.0688921	0.130999	0.00577353	-0.245941	581.696	Test(I) set
0.0173206	0.0802368	0.141994	0.0173206	-0.255843	583.186	Test(I) set
0.0288677	0.0915654	0.152957	0.0288677	-0.26569	584.675	Test(I) set
0.0404147	0.102878	0.16389	0.0404147	-0.27548	586.164	Test(I) set
0.0519618	0.114174	0.174792	0.0519618	-0.285215	587.653	Test(I) set
0.0635089	0.125455	0.185663	0.0635089	-0.294896	589.141	Test(I) set
0.075056	0.13672	0.196503	0.075056	-0.304522	590.629	Test(I) set
0.086603	0.147968	0.207313	0.086603	-0.314094	592.117	Test(I) set
0.0981501	0.159201	0.218093	0.0981501	-0.323612	593.604	Test(I) set
0.109697	0.170419	0.228842	0.109697	-0.333078	595.091	Test(I) set
0.121244	0.181621	0.239562	0.121244	-0.342491	596.577	Test(I) set
0.132791	0.192807	0.250252	0.132791	-0.351852	598.063	Test(I) set
0.144338	0.203978	0.260912	0.144338	-0.361161	599.549	Test(I) set
0.155885	0.215133	0.271543	0.155885	-0.370419	601.035	Test(I) set
0.167433	0.226273	0.282145	0.167433	-0.379626	602.52	Test(I) set
0.17898	0.237398	0.292718	0.17898	-0.388782	604.005	Test(I) set
0.190527	0.248507	0.303262	0.190527	-0.397889	605.489	Test(I) set
0.202074	0.259601	0.313777	0.202074	-0.406945	606.973	Test(I) set
0.213621	0.270681	0.324263	0.213621	-0.415953	608.457	Test(I) set
0.225168	0.281745	0.334721	0.225168	-0.424912	609.941	Test(I) set
0.236715	0.292794	0.345151	0.236715	-0.433822	611.424	Test(I) set
0.248262	0.303828	0.355552	0.248262	-0.442685	612.907	Test(I) set
0.259809	0.314848	0.365926	0.259809	-0.451499	614.389	Test(I) set
0.271356	0.325852	0.376271	0.271356	-0.460267	615.871	Test(I) set
0.282903	0.336842	0.386589	0.282903	-0.468987	617.353	Test(I) set
0.29445	0.347817	0.396879	0.29445	-0.477661	618.835	Test(I) set
0.305997	0.358778	0.407142	0.305997	-0.486289	620.316	Test(I) set
0.317544	0.369724	0.417378	0.317544	-0.494871	621.797	Test(I) set
0.329091	0.380655	0.427587	0.329091	-0.503408	623.277	Test(I) set
0.340639	0.391572	0.437768	0.340639	-0.5119	624.758	Test(I) set
0.352186	0.402475	0.447923	0.352186	-0.520347	626.238	Test(I) set
0.363733	0.413363	0.458051	0.363733	-0.528749	627.717	Test(I) set
0.37528	0.424237	0.468153	0.37528	-0.537108	629.197	Test(I) set
0.386827	0.435097	0.478228	0.386827	-0.545423	630.676	Test(I) set
0.398374	0.445943	0.488277	0.398374	-0.553695	632.154	Test(I) set
0.409921	0.456774	0.4983	0.409921	-0.561923	633.633	Test(I) set
0.421468	0.467592	0.508296	0.421468	-0.570109	635.111	Test(I) set
0.433015	0.478395	0.518267	0.433015	-0.578253	636.588	Test(I) set
0.444562	0.489185	0.528212	0.444562	-0.586355	638.066	Test(I) set
0.456109	0.49996	0.538132	0.456109	-0.594415	639.543	Test(I) set
0.467656	0.510722	0.548026	0.467656	-0.602434	641.02	Test(I) set
0.479203	0.52147	0.557895	0.479203	-0.610412	642.496	Test(I) set
0.49075	0.532204	0.567738	0.49075	-0.618349	643.973	Test(I) set
0.502298	0.542925	0.577557	0.502298	-0.626245	645.448	Test(I) set
0.513845	0.553632	0.58735	0.513845	-0.634102	646.924	Test(I) set
0.525392	0.564325	0.597119	0.525392	-0.641919	648.399	Test(I) set
0.536939	0.575005	0.606863	0.536939	-0.649696	649.874	Test(I) set
0.548486	0.585671	0.616582	0.548486	-0.657434	651.349	Test(I) set
0.560033	0.596324	0.626277	0.560033	-0.665134	652.823	Test(I) set
0.57158	0.606964	0.635948	0.57158	-0.672794	654.298	Test(I) set
0.583127	0.61759	0.645594	0.583127	-0.680417	655.771	Test(I) set
0.594674	0.628203	0.655217	0.594674	-0.688001	657.245	Test(I) set
0.606221	0.638803	0.664815	0.606221	-0.695548	658.718	Test(I) set
0.617768	0.649389	0.67439	0.617768	-0.703057	660.191	Test(I) set
0.629315	0.659962	0.68394	0.629315	-0.710529	661.664	Test(I) set
0.640862	0.670523	0.693468	0.640862	-0.717964	663.136	Test(I) set
0.652409	0.68107	0.702971	0.652409	-0.725362	664.608	Test(I) set
0.663956	0.691604	0.712452	0.663956	-0.732725	666.08	Test(I) set
0.675504	0.702126	0.721909	0.675504	-0.740051	667.551	Test(I) set
0.687051	0.712634	0.731343	0.687051	-0.747341	669.023	Test(I) set
0.698598	0.72313	0.740753	0.698598	-0.754596	670.493	Test(I) set
0.710145	0.733613	0.750141	0.710145	-0.761815	671.964	Test(I) set
0.721692	0.744083	0.759506	0.721692	-0.768999	673.434	Test(I) set
0.733239	0.75454	0.768849	0.733239	-0.776149	674.905	Test(I) set
0.744786	0.764985	0.778169	0.744786	-0.783264	676.374	Test(I) set
0.756333	0.775417	0.787466	0.756333	-0.790344	677.844	Test(I) set
0.76788	0.785837	0.796741	0.76788	-0.797391	679.313	Test(I) set
0.779427	0.796244	0.805994	0.779427	-0.804404	680.782	Test(I) set
0.790974	0.806639	0.815224	0.790974	-0.811383	682.251	Test(I) set
0.802521	0.817021	0.824433	0.802521	-0.818329	683.719	Test(I) set
0.814068	0.827391	0.833619	0.814068	-0.825242	685.187	Test(I) set
0.825615	0.837748	0.842784	0.825615	-0.832122	686.655	Test(I) set
0.837163	0.848093	0.851927	0.837163	-0.83897	688.122	Test(I) set
0.84871	0.858426	0.861048	0.84871	-0.845785	689.59	Test(I) set
0.860257	0.868747	0.870148	0.860257	-0.852568	691.057	Test(I) set
0.871804	0.879056	0.879226	0.871804	-0.859319	692.523	Test(I) set
0.883351	0.889352	0.888283	0.883351	-0.866038	693.99	Test(I) set
0.894898	0.899637	0.897319	0.894898	-0.872726	695.456	Test(I) set
0.906445	0.909909	0.906333	0.906445	-0.879382	696.922	Test(I) set
0.917992	0.920169	0.915327	0.917992	-0.886008	698.388	Test(I) set
0.929539	0.930418	0.9243	0.929539	-0.892603	699.853	Test(I) set
0.941086	0.940654	0.933251	0.941086	-0.899167	701.318	Test(I) set
0.952633	0.950879	0.942182	0.952633	-0.9057	702.783	Test(I) set
0.96418	0.961091	0.951093	0.96418	-0.912204	704.247	Test(I) set
0.975727	0.971292	0.959983	0.975727	-0.918678	705.712	Test(I) set
0.987274	0.981482	0.968852	0.987274	-0.925122	707.176	Test(I) set
0.998822	0.991659	0.977701	0.998822	-0.931536	708.64	Test(I) set
1.01037	1.00183	0.98653	1.01037	-0.937921	710.103	Test(I) set
1.02192	1.01198	0.995338	1.02192	-0.944276	711.566	Test(I) set
1.03346	1.02212	1.00413	1.03346	-0.950603	713.029	Test(I) set
1.04501	1.03225	1.0129	1.04501	-0.956901	714.492	Test(I) set
1.05656	1.04237	1.02164	1.05656	-0.963171	715.954	Test(I) set
1.0681	1.05248	1.03037	1.0681	-0.969412	717.417	Test(I) set
1.07965	1.06258	1.03908	1.07965	-0.975625	718.879	Test(I) set
-3.92023	-6.53479	-13.5704	-3.92023	117.932	25.2876	Test(B) set
-3.90868	-6.46922	-13.2031	-3.90868	106.872	27.5448	Test(B) set
-3.89714	-6.40658	-12.8678	-3.89714	97.656	29.7733	Test(B) set
-3.88559	-6.34649	-12.5593	-3.88559	89.8577	31.9759	Test(B) set
-3.87404	-6.28868	-12.2737	-3.87404	83.1734	34.1547	Test(B) set
-3.86249	-6.23289	-12.0078	-3.86249	77.3804	36.3117	Test(B) set
-3.85095	-6.17894	-11.7591	-3.85095	72.3115	38.4486	Test(B) set
-3.8394	-6.12664	-11.5255	-3.8394	67.839	40.5669	Test(B) set
-3.82785	-6.07587	-11.3052	-3.82785	63.8634	42.6678	Test(B) set
-3.81631	-6.02648	-11.0969	-3.81631	60.3063	44.7525	Test(B) set
-3.80476	-5.97838	-10.8992	-3.80476	57.1049	46.822	Test(B) set
-3.79321	-5.93147	-10.7112	-3.79321	54.2084	48.8772	Test(B) set
-3.78167	-5.88566	-10.5319	-3.78167	51.5752	50.9189	Test(B) set
-3.77012	-5.84088	-10.3606	-3.77012	49.171	52.9479	Test(B) set
-3.75857	-5.79707	-10.1966	-3.75857	46.9671	54.9648	Test(B) set
-3.74702	-5.75415	-10.0393	-3.74702	44.9396	56.9703	Test(B) set
-3.73548	-5.71209	-9.88811	-3.73548	43.068	58.9648	Test(B) set
-3.72393	-5.67083	-9.74266	-3.72393	41.335	60.949	Test(B) set
-3.71238	-5.63033	-9.60251	-3.71238	39.7258	62.9233	Test(B) set
-3.70084	-5.59054	-9.46728	-3.70084	38.2276	64.8881	Test(B) set
-3.68929	-5.55144	-9.33663	-3.68929	36.8293	66.8438	Test(B) set
-3.67774	-5.51298	-9.21027	-3.67774	35.5212	68.7908	Test(B) set
-3.66619	-5.47513	-9.08792	-3.66619	34.2949	70.7294	Test(B) set
-3.65465	-5.43788	-8.96933	-3.65465	33.1429	72.66	Test(B) set
-3.6431	-5.40118	-8.85428	-3.6431	32.0586	74.5829	Test(B) set
-3.63155	-5.36502	-8.74257	-3.63155	31.0363	76.4983	Test(B) set
-3.62001	-5.32937	-8.63401	-3.62001	30.0708	78.4066	Test(B) set
-3.60846	-5.29422	-8.52842	-3.60846	29.1575	80.3079	Test(B) set
-3.59691	-5.25953	-8.42565	-3.59691	28.2923	82.2025	Test(B) set
-3.58537	-5.2253	-8.32555	-3.58537	27.4714	84.0906	Test(B) set
-3.57382	-5.19151	-8.22798	-3.57382	26.6916	85.9725	Test(B) set
-3.56227	-5.15813	-8.13282	-3.56227	25.9498	87.8483	Test(B) set
-3.55072	-5.12516	-8.03995	-3.55072	25.2433	89.7182	Test(B) set
-3.53918	-5.09258	-7.94927	-3.53918	24.5697	91.5824	Test(B) set
-3.52763	-5.06038	-7.86068	-3.52763	23.9267	93.4411	Test(B) set
-3.51608	-5.02854	-7.77407	-3.51608	23.3123	95.2944	Test(B) set
-3.50454	-4.99705	-7.68937	-3.50454	22.7246	97.1424	Test(B) set
-3.49299	-4.9659	-7.60649	-3.49299	22.1619	98.9854	Test(B) set
-3.48144	-4.93509	-7.52536	-3.48144	21.6227	100.823	Test(B) set
-3.46989	-4.90459	-7.4459	-3.46989	21.1054	102.657	Test(B) set
-3.45835	-4.8744	-7.36804	-3.45835	20.6089	104.485	Test(B) set
-3.4468	-4.84451	-7.29173	-3.4468	20.1318	106.309	Test(B) set
-3.43525	-4.81492	-7.21689	-3.43525	19.6731	108.128	Test(B) set
-3.42371	-4.7856	-7.14349	-3.42371	19.2317	109.944	Test(B) set
-3.41216	-4.75656	-7.07145	-3.41216	18.8066	111.754	Test(B) set
-3.40061	-4.72779	-7.00074	-3.40061	18.397	113.561	Test(B) set
-3.38906	-4.69928	-6.9313	-3.38906	18.002	115.364	Test(B) set
-3.37752	-4.67103	-6.86309	-3.37752	17.6209	117.162	Test(B) set
-3.36597	-4.64302	-6.79607	-3.36597	17.253	118.957	Test(B) set
-3.35442	-4.61525	-6.73019	-3.35442	16.8974	120.748	Test(B) set
-3.34288	-4.58771	-6.66542	-3.34288	16.5538	122.536	Test(B) set
-3.33133	-4.56041	-6.60172	-3.33133	16.2214	124.319	Test(B) set
-3.31978	-4.53333	-6.53906	-3.31978	15.8997	126.1	Test(B) set
-3.30824	-4.50646	-6.4774	-3.30824	15.5883	127.876	Test(B) set
-3.29669	-4.47981	-6.41671	-3.29669	15.2866	129.65	Test(B) set
-3.28514	-4.45336	-6.35696	-3.28514	14.9941	131.419	Test(B) set
-3.27359	-4.42712	-6.29812	-3.27359	14.7106	133.186	Test(B) set
-3.26205	-4.40107	-6.24017	-3.26205	14.4355	134.95	Test(B) set
-3.2505	-4.37522	-6.18307	-3.2505	14.1684	136.71	Test(B) set
-3.23895	-4.34956	-6.12681	-3.23895	13.9092	138.467	Test(B) set
-3.22741	-4.32408	-6.07136	-3.22741	13.6573	140.221	Test(B) set
-3.21586	-4.29878	-6.0167	-3.21586	13.4125	141.973	Test(B) set
-3.20431	-4.27367	-5.9628	-3.20431	13.1745	143.721	Test(B) set
-3.19276	-4.24872	-5.90964	-3.19276	12.9431	145.467	Test(B) set
-3.18122	-4.22395	-5.85721	-3.18122	12.7179	147.209	Test(B) set
-3.16967	-4.19934	-5.80548	-3.16967	12.4987	148.949	Test(B) set
-3.15812	-4.1749	-5.75444	-3.15812	12.2853	150.686	Test(B) set
-3.14658	-4.15061	-5.70406	-3.14658	12.0774	152.421	Test(B) set
-3.13503	-4.12649	-5.65434	-3.13503	11.8748	154.153	Test(B) set
-3.12348	-4.10252	-5.60524	-3.12348	11.6774	155.882	Test(B) set
-3.11194	-4.0787	-5.55677	-3.11194	11.4849	157.609	Test(B) set
-3.10039	-4.05502	-5.50889	-3.10039	11.2972	159.333	Test(B) set
-3.08884	-4.0315	-5.46161	-3.08884	11.114	161.055	Test(B) set
-3.07729	-4.00811	-5.4149	-3.07729	10.9353	162.774	Test(B) set
-3.06575	-3.98487	-5.36874	-3.06575	10.7608	164.491	Test(B) set
-3.0542	-3.96176	-5.32314	-3.0542	10.5904	166.206	Test(B) set
-3.04265	-3.93879	-5.27806	-3.04265	10.424	167.918	Test(B) set
-3.03111	-3.91596	-5.23351	-3.03111	10.2614	169.628	Test(B) set
-3.01956	-3.89325	-5.18947	-3.01956	10.1025	171.336	Test(B) set
-3.00801	-3.87067	-5.14592	-3.00801	9.94716	173.042	Test(B) set
-2.99646	-3.84822	-5.10286	-2.99646	9.79528	174.745	Test(B) set
-2.98492	-3.8259	-5.06028	-2.98492	9.64674	176.447	Test(B) set
-2.97337	-3.80369	-5.01816	-2.97337	9.50143	178.146	Test(B) set
-2.96182	-3.78161	-4.9765	-2.96182	9.35925	179.843	Test(B) set
-2.95028	-3.75965	-4.93528	-2.95028	9.22009	181.538	Test(B) set
-2.93873	-3.7378	-4.8945	-2.93873	9.08386	183.231	Test(B) set
-2.92718	-3.71606	-4.85415	-2.92718	8.95047	184.922	Test(B) set
-2.91564	-3.69444	-4.81421	-2.91564	8.81982	186.611	Test(B) set
-2.90409	-3.67293	-4.77468	-2.90409	8.69185	188.298	Test(B) set
-2.89254	-3.65153	-4.73556	-2.89254	8.56646	189.984	Test(B) set
-2.88099	-3.63024	-4.69683	-2.88099	8.44358	191.667	Test(B) set
-2.86945	-3.60905	-4.65848	-2.86945	8.32313	193.348	Test(B) set
-2.8579	-3.58797	-4.62051	-2.8579	8.20504	195.028	Test(B) set
-2.84635	-3.56699	-4.58292	-2.84635	8.08925	196.706	Test(B) set
-2.83481	-3.54612	-4.54568	-2.83481	7.97568	198.382	Test(B) set
-2.82326	-3.52534	-4.5088	-2.82326	7.86428	200.056	Test(B) set
-2.81171	-3.50466	-4.47228	-2.81171	7.75497	201.728	Test(B) set
-2.80016	-3.48408	-4.43609	-2.80016	7.64771	203.399	Test(B) set
-2.78862	-3.4636	-4.40024	-2.78862	7.54244	205.068	Test(B) set
-2.77707	-3.44321	-4.36472	-2.77707	7.4391	206.736	Test(B) set
-2.76552	-3.42291	-4.32953	-2.76552	7.33764	208.401	Test(B) set
-2.75398	-3.4027	-4.29465	-2.75398	7.238	210.065	Test(B) set
-2.74243	-3.38259	-4.26009	-2.74243	7.14015	211.728	Test(B) set
-2.73088	-3.36256	-4.22583	-2.73088	7.04403	213.388	Test(B) set
-2.71933	-3.34263	-4.19188	-2.71933	6.94959	215.048	Test(B) set
-2.70779	-3.32278	-4.15822	-2.70779	6.8568	216.705	Test(B) set
-2.69624	-3.30302	-4.12486	-2.69624	6.7656	218.361	Test(B) set
-2.68469	-3.28334	-4.09178	-2.68469	6.67597	220.016	Test(B) set
-2.67315	-3.26375	-4.05898	-2.67315	6.58785	221.669	Test(B) set
-2.6616	-3.24423	-4.02646	-2.6616	6.50121	223.32	Test(B) set
-2.65005	-3.22481	-3.99421	-2.65005	6.41602	224.97	Test(B) set
-2.63851	-3.20546	-3.96223	-2.63851	6.33224	226.619	Test(B) set
-2.62696	-3.18619	-3.93051	-2.62696	6.24983	228.266	Test(B) set
-2.61541	-3.167	-3.89905	-2.61541	6.16876	229.912	Test(B) set
-2.60386	-3.14789	-3.86784	-2.60386	6.089	231.556	Test(B) set
-2.59232	-3.12885	-3.83689	-2.59232	6.01051	233.199	Test(B) set
-2.58077	-3.10989	-3.80618	-2.58077	5.93327	234.84	Test(B) set
-2.56922	-3.09101	-3.77572	-2.56922	5.85725	236.48	Test(B) set
-2.55768	-3.0722	-3.74549	-2.55768	5.78241	238.119	Test(B) set
-2.54613	-3.05346	-3.7155	-2.54613	5.70874	239.756	Test(B) set
-2.53458	-3.0348	-3.68574	-2.53458	5.63619	241.392	Test(B) set
-2.52303	-3.01621	-3.65621	-2.52303	5.56476	243.027	Test(B) set
-2.51149	-2.99768	-3.62691	-2.51149	5.49441	244.66	Test(B) set
-2.49994	-2.97923	-3.59782	-2.49994	5.42511	246.292	Test(B) set
-2.48839	-2.96085	-3.56896	-2.48839	5.35685	247.923	Test(B) set
-2.47685	-2.94254	-3.5403	-2.47685	5.2896	249.552	Test(B) set
-2.4653	-2.92429	-3.51186	-2.4653	5.22334	251.181	Test(B) set
-2.45375	-2.90611	-3.48363	-2.45375	5.15805	252.808	Test(B) set
-2.44221	-2.888	-3.4556	-2.44221	5.0937	254.433	Test(B) set
-2.43066	-2.86995	-3.42778	-2.43066	5.03028	256.058	Test(B) set
-2.41911	-2.85197	-3.40015	-2.41911	4.96777	257.681	Test(B) set
-2.40756	-2.83405	-3.37272	-2.40756	4.90614	259.303	Test(B) set
-2.39602	-2.8162	-3.34549	-2.39602	4.84538	260.924	Test(B) set
-2.38447	-2.7984	-3.31844	-2.38447	4.78547	262.544	Test(B) set
-2.37292	-2.78067	-3.29159	-2.37292	4.72639	264.163	Test(B) set
-2.36138	-2.76301	-3.26492	-2.36138	4.66813	265.78	Test(B) set
-2.34983	-2.7454	-3.23843	-2.34983	4.61067	267.396	Test(B) set
-2.33828	-2.72785	-3.21213	-2.33828	4.55398	269.011	Test(B) set
-2.32673	-2.71036	-3.186	-2.32673	4.49807	270.625	Test(B) set
-2.31519	-2.69293	-3.16005	-2.31519	4.4429	272.238	Test(B) set
-2.30364	-2.67556	-3.13427	-2.30364	4.38847	273.85	Test(B) set
-2.29209	-2.65825	-3.10866	-2.29209	4.33476	275.461	Test(B) set
-2.28055	-2.64099	-3.08323	-2.28055	4.28176	277.07	Test(B) set
-2.269	-2.62379	-3.05796	-2.269	4.22944	278.679	Test(B) set
-2.25745	-2.60665	-3.03285	-2.25745	4.17781	280.286	Test(B) set
-2.24591	-2.58956	-3.00791	-2.24591	4.12685	281.893	Test(B) set
-2.23436	-2.57253	-2.98312	-2.23436	4.07654	283.498	Test(B) set
-2.22281	-2.55555	-2.9585	-2.22281	4.02687	285.103	Test(B) set
-2.21126	-2.53863	-2.93403	-2.21126	3.97782	286.706	Test(B) set
-2.19972	-2.52176	-2.90972	-2.19972	3.9294	288.308	Test(B) set
-2.18817	-2.50494	-2.88556	-2.18817	3.88158	289.909	Test(B) set
-2.17662	-2.48818	-2.86154	-2.17662	3.83435	291.51	Test(B) set
-2.16508	-2.47146	-2.83768	-2.16508	3.78771	293.109	Test(B) set
-2.15353	-2.4548	-2.81397	-2.15353	3.74164	294.707	Test(B) set
-2.14198	-2.43819	-2.7904	-2.14198	3.69613	296.304	Test(B) set
-2.13043	-2.42163	-2.76697	-2.13043	3.65118	297.901	Test(B) set
-2.11889	-2.40512	-2.74368	-2.11889	3.60676	299.496	Test(B) set
-2.10734	-2.38866	-2.72054	-2.10734	3.56288	301.091	Test(B) set
-2.09579	-2.37225	-2.69753	-2.09579	3.51952	302.684	Test(B) set
-2.08425	-2.35589	-2.67466	-2.08425	3.47667	304.276	Test(B) set
-2.0727	-2.33958	-2.65192	-2.0727	3.43433	305.868	Test(B) set
-2.06115	-2.32331	-2.62932	-2.06115	3.39248	307.459	Test(B) set
-2.0496	-2.30709	-2.60685	-2.0496	3.35112	309.048	Test(B) set
-2.03806	-2.29092	-2.58451	-2.03806	3.31023	310.637	Test(B) set
-2.02651	-2.2748	-2.5623	-2.02651	3.26982	312.225	Test(B) set
-2.01496	-2.25872	-2.54021	-2.01496	3.22987	313.812	Test(B) set
-2.00342	-2.24269	-2.51825	-2.00342	3.19037	315.398	Test(B) set
-1.99187	-2.2267	-2.49642	-1.99187	3.15132	316.983	Test(B) set
-1.98032	-2.21076	-2.47471	-1.98032	3.1127	318.568	Test(B) set
-1.96878	-2.19486	-2.45312	-1.96878	3.07452	320.151	Test(B) set
-1.95723	-2.17901	-2.43165	-1.95723	3.03677	321.734	Test(B) set
-1.94568	-2.1632	-2.4103	-1.94568	2.99943	323.315	Test(B) set
-1.93413	-2.14743	-2.38907	-1.93413	2.9625	324.896	Test(B) set
-1.92259	-2.13171	-2.36795	-1.92259	2.92597	326.476	Test(B) set
-1.91104	-2.11603	-2.34695	-1.91104	2.88984	328.055	Test(B) set
-1.89949	-2.1004	-2.32606	-1.89949	2.8541	329.634	Test(B) set
-1.88795	-2.0848	-2.30529	-1.88795	2.81875	331.211	Test(B) set
-1.8764	-2.06925	-2.28462	-1.8764	2.78377	332.788	Test(B) set
-1.86485	-2.05374	-2.26407	-1.86485	2.74917	334.364	Test(B) set
-1.8533	-2.03827	-2.24362	-1.8533	2.71493	335.939	Test(B) set
-1.84176	-2.02284	-2.22329	-1.84176	2.68105	337.513	Test(B) set
-1.83021	-2.00745	-2.20306	-1.83021	2.64753	339.087	Test(B) set
-1.81866	-1.9921	-2.18293	-1.81866	2.61436	340.659	Test(B) set
-1.80712	-1.9768	-2.16292	-1.80712	2.58153	342.231	Test(B) set
-1.79557	-1.96153	-2.143	-1.79557	2.54904	343.802	Test(B) set
-1.78402	-1.9463	-2.12319	-1.78402	2.51688	345.373	Test(B) set
-1.77248	-1.93111	-2.10347	-1.77248	2.48505	346.942	Test(B) set
-1.76093	-1.91596	-2.08386	-1.76093	2.45354	348.511	Test(B) set
-1.74938	-1.90084	-2.06435	-1.74938	2.42236	350.079	Test(B) set
-1.73783	-1.88577	-2.04493	-1.73783	2.39148	351.646	Test(B) set
